# Supplementary material for: Novel asymmetric biscarbothioamides as Alzheimer's disease associated cholinesterase inhibitors: synthesis, biological activity, and molecular docking studies
Source: Royal Society of Chemistry journal article supplement (doi:10.1039/d4nj01462f), 2024-01-01
Supplement: d4nj01462f1.pdf [file d4nj01462f1.pdf]

## Supplementary Material

### **Novel asymmetric biscarbothioamides as Alzheimer's disease associated cholinesterase inhibitors: Synthesis, biological activity, and molecular docking studies**

Halit Muğlu <sup>a</sup>, Hasan Yakan <sup>b</sup>, Musa Erdoğan <sup>c,\*</sup>, Fevzi Topal <sup>d,\*</sup>, Meryem Topal <sup>e</sup>, Cüneyt Türkeş <sup>f</sup>, Şükrü Beydemir <sup>g,h</sup>

<sup>a</sup> *Department of Chemistry, Faculty of Sciences, Kastamonu University, Kastamonu 37200, Turkey*

<sup>b</sup> *Department of Chemistry Education, Faculty of Education, Ondokuz Mayıs University, Samsun 55200, Turkey*

<sup>c</sup> *Department of Food Engineering, Faculty of Engineering and Architecture, Kafkas University, Kars 36100, Turkey*

<sup>d</sup> *Department of Chemical and Chemical Processing Technologies, Laboratory Technology, Gümüşhane University, Gümüşhane 29100, Turkey*

<sup>e</sup> *Vocational School of Health Services, Gümüşhane University, Gümüşhane 29100, Turkey*

<sup>f</sup> *Department of Biochemistry, Faculty of Pharmacy, Erzincan Binali Yıldırım University, Erzincan 24002, Turkey*

<sup>g</sup> *Department of Biochemistry, Faculty of Pharmacy, Anadolu University, Eskişehir 26470, Turkey*

<sup>h</sup> *Bilecik Şeyh Edebalı University, Bilecik 11230, Turkey*

---

\* Corresponding authors.

Department of Food Engineering, Faculty of Engineering and Architecture, Kafkas University, Kars 36100, Turkey; E-mail: musa.erdogan@kafkas.edu.tr; ORCID ID: 0000-0001-6097-2862 (M.Erdoğan).

Department of Chemical and Chemical Processing Technologies, Laboratory Technology, Gümüşhane University, Gümüşhane 29100, Turkey; E-mail: ftopal@gumushane.edu.tr; ORCID ID: 0000-0002-2932-2789 (F.Topal).

## Table of Contents

- Table S1.** FT-IR values of the novel asymmetric bis(carbothioamides) (**3a-l**) ( $\text{cm}^{-1}$ ).
- Table S2.** ADME/T related parameters of the novel asymmetric bis(carbothioamides) (**3a-l**) and clinically used reference inhibitor tacrine.
- Table S3.** Pharmacokinetic properties of the novel asymmetric bis(carbothioamides) (**3a-l**) and clinically used reference inhibitor tacrine.
- Table S4.** Drug-likeness descriptors of the novel asymmetric bis(carbothioamides) (**3a-l**) and clinically used reference inhibitor tacrine.
- Table S5.** Medicinal Chemistry pattern recognition methods of the novel asymmetric bis(carbothioamides) (**3a-l**) and clinically used reference inhibitor tacrine.
- Fig. S1.** Diagrams showing 'drug-likeness' descriptors for the novel asymmetric bis(carbothioamides) (**3a-l**) and clinically used reference inhibitor tacrine. The red-colored zone has been identified as a feasible physicochemical domain to enhance oral bioavailability. LIPO, lipophilicity; SIZE, molecular weight; POLAR, polarity; INSOLU, insolubility; INSATU, saturation; and FLEX, flexibility.
- Fig. S2.**  $^1\text{H-NMR}$  (400 MHz,  $\text{DMSO-}d_6$ ) spectra of compound **3a** ( $N^1$ -ethyl- $N^2$ -phenylhydrazine-1,2-bis(carbothioamide)).
- Fig. S3.**  $^{13}\text{C-NMR}$  (100 MHz,  $\text{DMSO-}d_6$ ) spectra of compound **3a** ( $N^1$ -ethyl- $N^2$ -phenylhydrazine-1,2-bis(carbothioamide)).
- Fig. S4.** FT-IR spectra of compound **3a** ( $N^1$ -ethyl- $N^2$ -phenylhydrazine-1,2-bis(carbothioamide)).
- Fig. S5.** Lineweaver-Burk plots of compound **3a** ( $N^1$ -ethyl- $N^2$ -phenylhydrazine-1,2-bis(carbothioamide)).
- Fig. S6.**  $^1\text{H-NMR}$  (400 MHz,  $\text{DMSO-}d_6$ ) spectra of compound **3b** ( $N^1$ -(3-methoxyphenyl)- $N^2$ -phenylhydrazine-1,2-bis(carbothioamide)).
- Fig. S7.**  $^{13}\text{C-NMR}$  (100 MHz,  $\text{DMSO-}d_6$ ) spectra of compound **3b** ( $N^1$ -(3-methoxyphenyl)- $N^2$ -phenylhydrazine-1,2-bis(carbothioamide)).
- Fig. S8.** FT-IR spectra of compound **3b** ( $N^1$ -(3-methoxyphenyl)- $N^2$ -phenylhydrazine-1,2-bis(carbothioamide)).
- Fig. S9.** Lineweaver-Burk plots of compound **3b** ( $N^1$ -(3-methoxyphenyl)- $N^2$ -phenylhydrazine-1,2-bis(carbothioamide)).
- Fig. S10.**  $^1\text{H-NMR}$  (400 MHz,  $\text{DMSO-}d_6$ ) spectra of compound **3c** ( $N^1$ -(4-methoxyphenyl)- $N^2$ -phenylhydrazine-1,2-bis(carbothioamide)).
- Fig. S11.**  $^{13}\text{C-NMR}$  (100 MHz,  $\text{DMSO-}d_6$ ) spectra of compound **3c** ( $N^1$ -(4-methoxyphenyl)- $N^2$ -phenylhydrazine-1,2-bis(carbothioamide)).
- Fig. S12.** FT-IR spectra of compound **3c** ( $N^1$ -(4-methoxyphenyl)- $N^2$ -phenylhydrazine-1,2-bis(carbothioamide)).
- Fig. S13.** Lineweaver-Burk plots of compound **3c** ( $N^1$ -(4-methoxyphenyl)- $N^2$ -phenylhydrazine-1,2-bis(carbothioamide)).
- Fig. S14.**  $^1\text{H-NMR}$  (400 MHz,  $\text{DMSO-}d_6$ ) spectra of compound **3d** ( $N^1$ -(4-chlorophenyl)- $N^2$ -phenylhydrazine-1,2-bis(carbothioamide)).

- Fig. S15.**  $^{13}\text{C}$ -NMR (100 MHz,  $\text{DMSO-}d_6$ ) spectra of compound **3d** ( $N^1$ -(4-chlorophenyl)- $N^2$ -phenylhydrazine-1,2-bis(carbothioamide)).
- Fig. S16.** FT-IR spectra of compound **3d** ( $N^1$ -(4-chlorophenyl)- $N^2$ -phenylhydrazine-1,2-bis(carbothioamide)).
- Fig. S17.** Lineweaver-Burk plots of compound **3d** ( $N^1$ -(4-chlorophenyl)- $N^2$ -phenylhydrazine-1,2-bis(carbothioamide)).
- Fig. S18.**  $^1\text{H}$ -NMR (400 MHz,  $\text{DMSO-}d_6$ ) spectra of compound **3e** ( $N^1$ -(2-fluorophenyl)- $N^2$ -phenylhydrazine-1,2-bis(carbothioamide)).
- Fig. S19.**  $^{13}\text{C}$ -NMR (100 MHz,  $\text{DMSO-}d_6$ ) spectra of compound **3e** ( $N^1$ -(2-fluorophenyl)- $N^2$ -phenylhydrazine-1,2-bis(carbothioamide)).
- Fig. S20.** FT-IR spectra of compound **3e** ( $N^1$ -(2-fluorophenyl)- $N^2$ -phenylhydrazine-1,2-bis(carbothioamide)).
- Fig. S21.** Lineweaver-Burk plots of compound **3e** ( $N^1$ -(2-fluorophenyl)- $N^2$ -phenylhydrazine-1,2-bis(carbothioamide)).
- Fig. S22.**  $^1\text{H}$ -NMR (400 MHz,  $\text{DMSO-}d_6$ ) spectra of compound **3f** ( $N^1$ -phenyl- $N^2$ -(*p*-tolyl)hydrazine-1,2-bis(carbothioamide)).
- Fig. S23.**  $^{13}\text{C}$ -NMR (100 MHz,  $\text{DMSO-}d_6$ ) spectra of compound **3f** ( $N^1$ -phenyl- $N^2$ -(*p*-tolyl)hydrazine-1,2-bis(carbothioamide)).
- Fig. S24.** FT-IR spectra of compound **3f** ( $N^1$ -phenyl- $N^2$ -(*p*-tolyl)hydrazine-1,2-bis(carbothioamide)).
- Fig. S25.** Lineweaver-Burk plots of compound **3f** ( $N^1$ -phenyl- $N^2$ -(*p*-tolyl)hydrazine-1,2-bis(carbothioamide)).
- Fig. S26.**  $^1\text{H}$ -NMR (400 MHz,  $\text{DMSO-}d_6$ ) spectra of compound **3g** ( $N^1$ -allyl- $N^2$ -(4-nitrophenyl)hydrazine-1,2-bis(carbothioamide)).
- Fig. S27.**  $^{13}\text{C}$ -NMR (100 MHz,  $\text{DMSO-}d_6$ ) spectra of compound **3g** ( $N^1$ -allyl- $N^2$ -(4-nitrophenyl)hydrazine-1,2-bis(carbothioamide)).
- Fig. S28.** FT-IR spectra of compound **3g** ( $N^1$ -allyl- $N^2$ -(4-nitrophenyl)hydrazine-1,2-bis(carbothioamide)).
- Fig. S29.** Lineweaver-Burk plots of compound **3g** ( $N^1$ -allyl- $N^2$ -(4-nitrophenyl)hydrazine-1,2-bis(carbothioamide)).
- Fig. S30.**  $^1\text{H}$ -NMR (400 MHz,  $\text{DMSO-}d_6$ ) spectra of compound **3h** ( $N^1$ -(3-methoxyphenyl)- $N^2$ -(4-nitrophenyl)hydrazine-1,2-bis(carbothioamide)).
- Fig. S31.**  $^{13}\text{C}$ -NMR (100 MHz,  $\text{DMSO-}d_6$ ) spectra of compound **3h** ( $N^1$ -(3-methoxyphenyl)- $N^2$ -(4-nitrophenyl)hydrazine-1,2-bis(carbothioamide)).
- Fig. S32.** FT-IR spectra of compound **3h** ( $N^1$ -(3-methoxyphenyl)- $N^2$ -(4-nitrophenyl)hydrazine-1,2-bis(carbothioamide)).
- Fig. S33.** Lineweaver-Burk plots of compound **3h** ( $N^1$ -(3-methoxyphenyl)- $N^2$ -(4-nitrophenyl)hydrazine-1,2-bis(carbothioamide)).
- Fig. S34.**  $^1\text{H}$ -NMR (400 MHz,  $\text{DMSO-}d_6$ ) spectra of compound **3i** ( $N^1$ -(4-methoxyphenyl)- $N^2$ -(4-nitrophenyl)hydrazine-1,2-bis(carbothioamide)).
- Fig. S35.**  $^{13}\text{C}$ -NMR (100 MHz,  $\text{DMSO-}d_6$ ) spectra of compound **3i** ( $N^1$ -(4-methoxyphenyl)- $N^2$ -(4-nitrophenyl)hydrazine-1,2-bis(carbothioamide)).

- Fig. S36.** FT-IR spectra of compound **3i** (*N*<sup>1</sup>-(4-methoxyphenyl)-*N*<sup>2</sup>-(4-nitrophenyl)hydrazine-1,2-bis(carbothioamide)).
- Fig. S37.** Lineweaver-Burk plots of compound **3i** (*N*<sup>1</sup>-(4-methoxyphenyl)-*N*<sup>2</sup>-(4-nitrophenyl)hydrazine-1,2-bis(carbothioamide)).
- Fig. S38.** <sup>1</sup>H-NMR (400 MHz, DMSO-*d*<sub>6</sub>) spectra of compound **3j** (*N*<sup>1</sup>-(3-fluorophenyl)-*N*<sup>2</sup>-(4-nitrophenyl)hydrazine-1,2-bis(carbothioamide)).
- Fig. S39.** <sup>13</sup>C-NMR (100 MHz, DMSO-*d*<sub>6</sub>) spectra of compound **3j** (*N*<sup>1</sup>-(3-fluorophenyl)-*N*<sup>2</sup>-(4-nitrophenyl)hydrazine-1,2-bis(carbothioamide)).
- Fig. S40.** FT-IR spectra of compound **3j** (*N*<sup>1</sup>-(3-fluorophenyl)-*N*<sup>2</sup>-(4-nitrophenyl)hydrazine-1,2-bis(carbothioamide)).
- Fig. S41.** Lineweaver-Burk plots of compound **3j** (*N*<sup>1</sup>-(3-fluorophenyl)-*N*<sup>2</sup>-(4-nitrophenyl)hydrazine-1,2-bis(carbothioamide)).
- Fig. S42.** <sup>1</sup>H-NMR (400 MHz, DMSO-*d*<sub>6</sub>) spectra of compound **3k** (*N*<sup>1</sup>-benzyl-*N*<sup>2</sup>-(4-nitrophenyl)hydrazine-1,2-bis(carbothioamide)).
- Fig. S43.** <sup>13</sup>C-NMR (100 MHz, DMSO-*d*<sub>6</sub>) spectra of compound **3k** (*N*<sup>1</sup>-benzyl-*N*<sup>2</sup>-(4-nitrophenyl)hydrazine-1,2-bis(carbothioamide)).
- Fig. S44.** FT-IR spectra of compound **3k** (*N*<sup>1</sup>-benzyl-*N*<sup>2</sup>-(4-nitrophenyl)hydrazine-1,2-bis(carbothioamide)).
- Fig. S45.** Lineweaver-Burk plots of compound **3k** (*N*<sup>1</sup>-benzyl-*N*<sup>2</sup>-(4-nitrophenyl)hydrazine-1,2-bis(carbothioamide)).
- Fig. S46.** <sup>1</sup>H-NMR (400 MHz, DMSO-*d*<sub>6</sub>) spectra of compound **3l** (*N*<sup>1</sup>-(3-chlorophenyl)-*N*<sup>2</sup>-(4-nitrophenyl)hydrazine-1,2-bis(carbothioamide)).
- Fig. S47.** <sup>13</sup>C-NMR (100 MHz, DMSO-*d*<sub>6</sub>) spectra of compound **3l** (*N*<sup>1</sup>-(3-chlorophenyl)-*N*<sup>2</sup>-(4-nitrophenyl)hydrazine-1,2-bis(carbothioamide)).
- Fig. S48.** FT-IR spectra of compound **3l** (*N*<sup>1</sup>-(3-chlorophenyl)-*N*<sup>2</sup>-(4-nitrophenyl)hydrazine-1,2-bis(carbothioamide)).
- Fig. S49.** Lineweaver-Burk plots of compound **3l** (*N*<sup>1</sup>-(3-chlorophenyl)-*N*<sup>2</sup>-(4-nitrophenyl)hydrazine-1,2-bis(carbothioamide)).

**Table S1.** FT-IR values of the novel asymmetric bis(carbothioamides) (**3a-l**) (cm<sup>-1</sup>).

| Compounds ID | N <sup>1</sup> H | N <sup>2</sup> H | N <sup>3</sup> H | Ar H | Aliph. H | C=S  | NO <sub>2</sub> <sup>a</sup> | C-N                  | Specific Peak        |           |
|--------------|------------------|------------------|------------------|------|----------|------|------------------------------|----------------------|----------------------|-----------|
| <b>3a</b>    | 3265             | 3194             | 3119             | 3028 | 2949     | 1375 | -                            | 1189<br>1153<br>1097 | -                    |           |
| <b>3b</b>    | 3243             | 3195             | 3110             | 2999 | 2937     | 1338 | -                            | 1186<br>1169<br>1039 | -                    |           |
| <b>3c</b>    | 3206             |                  | 3106             | 3004 | 2935     | 1337 | -                            | 1181<br>1102<br>1026 | -                    |           |
| <b>3d</b>    |                  | 3181             |                  | 3108 | 3010     | 2936 | 1336                         | -                    | 1183<br>1160<br>1086 | C-Cl: 958 |
| <b>3e</b>    | 3212             |                  | 3108             |      | 3007     | 2935 | 1334                         | -                    | 1100<br>1070<br>1024 | C-F: 1183 |
| <b>3f</b>    | 3193             |                  | 3105             |      | 3013     | 2936 | 1337                         | -                    | 1184<br>1105<br>1069 | -         |
| <b>3g</b>    | 3393             | 3252             | 3155             | 3048 | 2914     | 1389 | 1505<br>1323                 | 1186<br>1108<br>1046 | -                    |           |
| <b>3h</b>    | 3329             | 3205             | 3161             | 3082 | 2891     | 1352 | 1468<br>1321                 | 1204<br>1109<br>1050 | -                    |           |
| <b>3i</b>    | 3218             |                  | 3105             |      | 3006     | 2934 | 1295                         | 1504<br>1344         | 1189<br>1103<br>1028 | -         |
| <b>3j</b>    | 3323             | 3214             | 3160             | 3043 | 2897     | 1323 | 1496<br>1297                 | 1186<br>1002<br>961  | C-F: 1107            |           |
| <b>3k</b>    | 3329             | 3272             | 3102             | 2991 | 2878     | 1372 | 1502<br>1330                 | 1166<br>1104<br>1068 | -                    |           |
| <b>3l</b>    | 3327             | 3183             | 3072             | 3033 | 2812     | 1370 | 1476<br>1332                 | 1241<br>1198<br>1110 | C-Cl: 999            |           |

<sup>a</sup> The asymmetric and symmetric stretching vibrations.

**Table S2.** ADME/T related parameters <sup>a</sup> of the novel asymmetric bis(carbothioamides) (**3a-l**) and clinically used reference inhibitor tacrine.

| Compound ID             | #stars | #rtVFG | CNS | MW     | Dipole | SASA  | Volume | donorHB | acctpHB | QPlogPC16 | QPlogPoct | QPlogPw | QPlogS | QPPCaco | QPlogBB | QPPMDCK | QPlogKp | #metab | QPlogKhsa | HOA | PSA   | Rule of Five | Rule of Three |
|-------------------------|--------|--------|-----|--------|--------|-------|--------|---------|---------|-----------|-----------|---------|--------|---------|---------|---------|---------|--------|-----------|-----|-------|--------------|---------------|
| <b>3a</b>               | 0      | 1      | -1  | 254.37 | 2.0    | 535.2 | 859.9  | 4.0     | 5.0     | 9.7       | 4.0       | 5.0     | 4.0    | 1862    | -0.9    | 4284    | -1.9    | 1      | -0.28     | 100 | 66.4  | 0            | 0             |
| <b>3b</b>               | 0      | 1      | -1  | 332.44 | 1.5    | 646.5 | 1065.0 | 4.0     | 5.8     | 12.9      | 4.0       | 5.8     | 4.0    | 1778    | -0.2    | 4356    | -1.3    | 3      | 0.34      | 100 | 73.3  | 0            | 0             |
| <b>3c</b>               | 0      | 1      | -1  | 332.44 | 1.5    | 647.6 | 1066.0 | 4.0     | 5.8     | 12.9      | 4.0       | 5.8     | 4.0    | 1830    | -0.2    | 4784    | -1.3    | 2      | 0.36      | 100 | 73.4  | 0            | 0             |
| <b>3d</b>               | 1      | 1      | 0   | 336.86 | 2.3    | 637.7 | 1035.8 | 4.0     | 5.0     | 13.2      | 4.0       | 5.0     | 4.0    | 1780    | 0.0     | 10000   | -1.4    | 1      | 0.10      | 100 | 65.1  | 0            | 1             |
| <b>3e</b>               | 0      | 1      | 0   | 320.40 | 3.0    | 602.4 | 995.0  | 4.0     | 5.0     | 12.0      | 4.0       | 5.0     | 4.0    | 2228    | 0.5     | 8409    | -1.2    | 2      | 0.22      | 100 | 64.8  | 0            | 0             |
| <b>3f</b>               | 2      | 1      | -1  | 316.44 | 2.4    | 646.3 | 1052.2 | 4.0     | 5.0     | 12.8      | 4.0       | 5.0     | 4.0    | 1778    | -0.2    | 4573    | -1.4    | 3      | 0.14      | 100 | 65.1  | 0            | 1             |
| <b>3g</b>               | 1      | 1      | -2  | 311.38 | 8.3    | 597.3 | 976.4  | 4.0     | 6.0     | 11.5      | 4.0       | 6.0     | 4.0    | 217     | -1.3    | 418     | -3.6    | 2      | -0.23     | 80  | 111.2 | 0            | 0             |
| <b>3h</b>               | 1      | 1      | -2  | 377.44 | 6.8    | 686.4 | 1139.3 | 4.0     | 6.8     | 14.0      | 4.0       | 6.8     | 4.0    | 211     | -1.4    | 435     | -3.2    | 3      | 0.21      | 84  | 118.3 | 0            | 1             |
| <b>3i</b>               | 1      | 1      | -2  | 377.44 | 8.6    | 686.7 | 1139.6 | 4.0     | 6.8     | 14.0      | 4.0       | 6.8     | 4.0    | 217     | -1.4    | 477     | -3.2    | 2      | 0.22      | 85  | 118.4 | 0            | 1             |
| <b>3j</b>               | 1      | 1      | -2  | 365.40 | 6.6    | 661.1 | 1081.0 | 4.0     | 6.0     | 13.2      | 4.0       | 6.0     | 4.0    | 210     | -1.2    | 821     | -3.3    | 2      | 0.29      | 85  | 110.1 | 0            | 1             |
| <b>3k</b>               | 1      | 1      | -2  | 361.44 | 8.3    | 661.7 | 1108.7 | 4.0     | 6.0     | 13.8      | 4.0       | 6.0     | 4.0    | 246     | -1.3    | 449     | -3.0    | 2      | 0.67      | 86  | 110.8 | 0            | 0             |
| <b>3l</b>               | 2      | 1      | -2  | 381.85 | 6.7    | 676.2 | 1109.1 | 4.0     | 6.0     | 14.2      | 4.0       | 6.0     | 4.0    | 210     | -1.2    | 1122    | -3.3    | 2      | 0.93      | 87  | 110.1 | 0            | 1             |
| <b>THA</b> <sup>b</sup> | 0      | 0      | 1   | 198.27 | 4.2    | 430.7 | 709.9  | 1.5     | 2.0     | 6.9       | 10.7      | 6.4     | -3.1   | 2931    | 0.0     | 1582    | -1.8    | 3      | 0.71      | 100 | 34.2  | 0            | 0             |

<sup>a</sup> Various computational pharmacodynamic and pharmacokinetic parameters of synthesized compounds in this research were predicted such as number of property or descriptor values that fall outside the 95% range of similar values for known drugs. (#stars; 0 - 5), number of reactive functional groups (#rtVFG; 0 - 2), central nervous system activity (CNS; -2 inactive, +2 active), molecular weight of the compound (MW; 130.0 - 725.0), computed dipole moment of the compound (Dipole; 1.0 - 12.5), total solvent accessible surface area (SASA; 300.0 - 1000.0), total solvent-accessible volume in cubic angstroms using a probe with a 1.4 Å Radius (Volume; 500.0 - 2000.0), number of hydrogen bonds that would be donated by the solute to water molecules in an aqueous solution (donorHB; 0.0 - 6.0), number of hydrogen bonds that would be accepted by the solute from water molecules in an aqueous solution (acctpHB; 2.0 - 20.0), hexadecane/gas partition coefficient (QPlogPC16; 4.0 - 18.0), octanol/gas partition coefficient (QPlogPoct; 8.0 - 35.0), water/gas partition coefficient (QPlogPw; 4.0 - 45.0), aqueous solubility (QPlogS; -6.5 - 0.5), apparent Caco-2 cell permeability in nm/sec (QPPCaco; <25 poor, great>500), brain/blood partition coefficient (QPlogBB; -3.0 - 1.2), apparent MDCK cell permeability in nm/sec (QPPMDCK; <25 poor, great>500), skin permeability (QPlogKp; -8.0 - -1.0), number of likely metabolic reactions (#metab; 1 - 8), prediction of binding to human serum albumin (QPlogKhsa; -1.5 - 1.5), human oral absorption (HOA; <25% poor, high>80%), van der Waals surface area of polar nitrogen and oxygen atoms (PSA; 7.0 - 200.0), number of violations of Lipinski's rule of five (max. 4), and number of violations of Jorgensen's rule of three (max. 3).

<sup>b</sup> Tacrine.

**Table S3.** Pharmacokinetic properties <sup>a</sup> of the novel asymmetric bis(carbothioamides) (**3a-l**) and clinically used reference inhibitor tacrine.

| Compounds ID            | GI absorption | BBB permeant | P-gp substrate | CYP inhibitor |         |        |        |        |
|-------------------------|---------------|--------------|----------------|---------------|---------|--------|--------|--------|
|                         |               |              |                | CYP1A2        | CYP2C19 | CYP2C9 | CYP2D6 | CYP3A4 |
| <b>3a</b>               | High          | No           | No             | No            | Yes     | No     | No     | No     |
| <b>3b</b>               | High          | No           | No             | No            | Yes     | Yes    | Yes    | No     |
| <b>3c</b>               | High          | No           | No             | No            | Yes     | Yes    | Yes    | No     |
| <b>3d</b>               | High          | No           | No             | No            | Yes     | Yes    | No     | Yes    |
| <b>3e</b>               | High          | No           | No             | No            | Yes     | Yes    | No     | Yes    |
| <b>3f</b>               | High          | No           | No             | No            | Yes     | Yes    | No     | Yes    |
| <b>3g</b>               | Low           | No           | No             | No            | No      | No     | No     | No     |
| <b>3h</b>               | Low           | No           | No             | No            | No      | Yes    | Yes    | No     |
| <b>3i</b>               | Low           | No           | No             | No            | No      | Yes    | Yes    | No     |
| <b>3j</b>               | Low           | No           | No             | No            | No      | Yes    | No     | No     |
| <b>3k</b>               | Low           | No           | No             | No            | No      | Yes    | No     | No     |
| <b>3l</b>               | Low           | No           | No             | No            | No      | Yes    | No     | No     |
| <b>THA</b> <sup>b</sup> | High          | Yes          | Yes            | Yes           | No      | No     | No     | Yes    |

<sup>a</sup> Various pharmacokinetic parameters, such as the GI absorption, human gastrointestinal absorption; BBB permeant, blood-brain barrier permeation; P-gp substrate, prediction of being substrate or non-substrate of P-glycoprotein; CYP inhibitor, prediction of being inhibitor or non-inhibitor of cytochromes P450 (CYP) five major isoforms (CYP1A2, CYP2C19, CYP2C9, CYP2D6, CYP3A4); and log  $K_p$ , prediction of the skin permeability coefficient of targeted compounds in this research, were predicted using SwissADME platform.

<sup>b</sup> Tacrine.

**Table S4.** Drug-likeness descriptors <sup>a</sup> of the novel asymmetric bis(carbothioamides) (**3a-l**) and clinically used reference inhibitor tacrine.

| Compounds ID            | Ghose | Veber                        | Egan                           | Muegge                       | Bioavailability Score |
|-------------------------|-------|------------------------------|--------------------------------|------------------------------|-----------------------|
| <b>3a</b>               | Yes   | Yes                          | Yes                            | Yes                          | 0.55                  |
| <b>3b</b>               | Yes   | Yes                          | Yes                            | Yes                          | 0.55                  |
| <b>3c</b>               | Yes   | Yes                          | Yes                            | Yes                          | 0.55                  |
| <b>3d</b>               | Yes   | Yes                          | Yes                            | Yes                          | 0.55                  |
| <b>3e</b>               | Yes   | Yes                          | Yes                            | Yes                          | 0.55                  |
| <b>3f</b>               | Yes   | Yes                          | Yes                            | Yes                          | 0.55                  |
| <b>3g</b>               | Yes   | No; 1 violation:<br>TPSA>140 | No; 1 violation:<br>TPSA>131.6 | No; 1 violation:<br>TPSA>150 | 0.55                  |
| <b>3h</b>               | Yes   | No; 1 violation:<br>TPSA>140 | No; 1 violation:<br>TPSA>131.6 | No; 1 violation:<br>TPSA>150 | 0.55                  |
| <b>3i</b>               | Yes   | No; 1 violation:<br>TPSA>140 | No; 1 violation:<br>TPSA>131.6 | No; 1 violation:<br>TPSA>150 | 0.55                  |
| <b>3j</b>               | Yes   | No; 1 violation:<br>TPSA>140 | No; 1 violation:<br>TPSA>131.6 | No; 1 violation:<br>TPSA>150 | 0.55                  |
| <b>3k</b>               | Yes   | No; 1 violation:<br>TPSA>140 | No; 1 violation:<br>TPSA>131.6 | No; 1 violation:<br>TPSA>150 | 0.55                  |
| <b>3l</b>               | Yes   | No; 1 violation:<br>TPSA>140 | No; 1 violation:<br>TPSA>131.6 | No; 1 violation:<br>TPSA>150 | 0.55                  |
| <b>THA</b> <sup>b</sup> | Yes   | Yes                          | Yes                            | No; 1 violation:<br>MW<200   | 0.55                  |

<sup>a</sup> Drug-likeness parameters, such as the Ghose (Amgen), Veber (GSK), Egan (Pharmacia), and Muegge (Bayer) methods and bioavailability score (Abbot) of targeted compounds in this research, were predicted using SwissADME platform.

<sup>b</sup> Tacrine.



**Table S5.** Medicinal Chemistry pattern recognition methods <sup>a</sup> of the novel asymmetric bis(carbothioamides) (**3a-l**) and clinically used reference inhibitor tacrine.

| Compounds ID            | PAINS   | Brenk                                                                                   | Lead-likeness                      | SA score |
|-------------------------|---------|-----------------------------------------------------------------------------------------|------------------------------------|----------|
| <b>3a</b>               | 0 alert | 1 alert: thiocarbonyl group                                                             | Yes                                | 2.52     |
| <b>3b</b>               | 0 alert | 1 alert: thiocarbonyl group                                                             | No; 1 violation: Rotors>7          | 2.78     |
| <b>3c</b>               | 0 alert | 1 alert: thiocarbonyl group                                                             | No; 1 violation: Rotors>7          | 2.61     |
| <b>3d</b>               | 0 alert | 1 alert: thiocarbonyl group                                                             | No; 1 violation: XLOGP3>3.5        | 2.67     |
| <b>3e</b>               | 0 alert | 1 alert: thiocarbonyl group                                                             | Yes                                | 2.88     |
| <b>3f</b>               | 0 alert | 1 alert: thiocarbonyl group                                                             | Yes                                | 2.54     |
| <b>3g</b>               | 0 alert | 4 alerts: isolated alkene, nitro group, oxygen-nitrogen single bond, thiocarbonyl group | No; 1 violation: Rotors>7          | 2.82     |
| <b>3h</b>               | 0 alert | 3 alerts: nitro group, oxygen-nitrogen single bond, thiocarbonyl group                  | No; 2 violations: MW>350, Rotors>7 | 2.99     |
| <b>3i</b>               | 0 alert | 3 alerts: nitro group, oxygen-nitrogen single bond, thiocarbonyl group                  | No; 2 violations: MW>350, Rotors>7 | 2.86     |
| <b>3j</b>               | 0 alert | 3 alerts: nitro group, oxygen-nitrogen single bond, thiocarbonyl group                  | No; 2 violations: MW>350, Rotors>7 | 2.91     |
| <b>3k</b>               | 0 alert | 3 alerts: nitro group, oxygen-nitrogen single bond, thiocarbonyl group                  | No; 2 violations: MW>350, Rotors>7 | 2.79     |
| <b>3l</b>               | 0 alert | 3 alerts: nitro group, oxygen-nitrogen single bond, thiocarbonyl group                  | No; 2 violations: MW>350, Rotors>7 | 2.90     |
| <b>THA <sup>b</sup></b> | 0 alert | 0 alert                                                                                 | No; 1 violation: MW>350            | 2.08     |

<sup>a</sup> Medicinal Chemistry pattern recognition method, such as the PAINS, pan assay interference structure alert filter; Brenk, structural alert filter; Lead-likeness, lead-likeness criteria; and SA score, synthetic accessibility score (ranges from 1, very easy, to 10, very difficult) of targeted compounds in this research, were predicted using SwissADME platform.

<sup>b</sup> Tacrine.

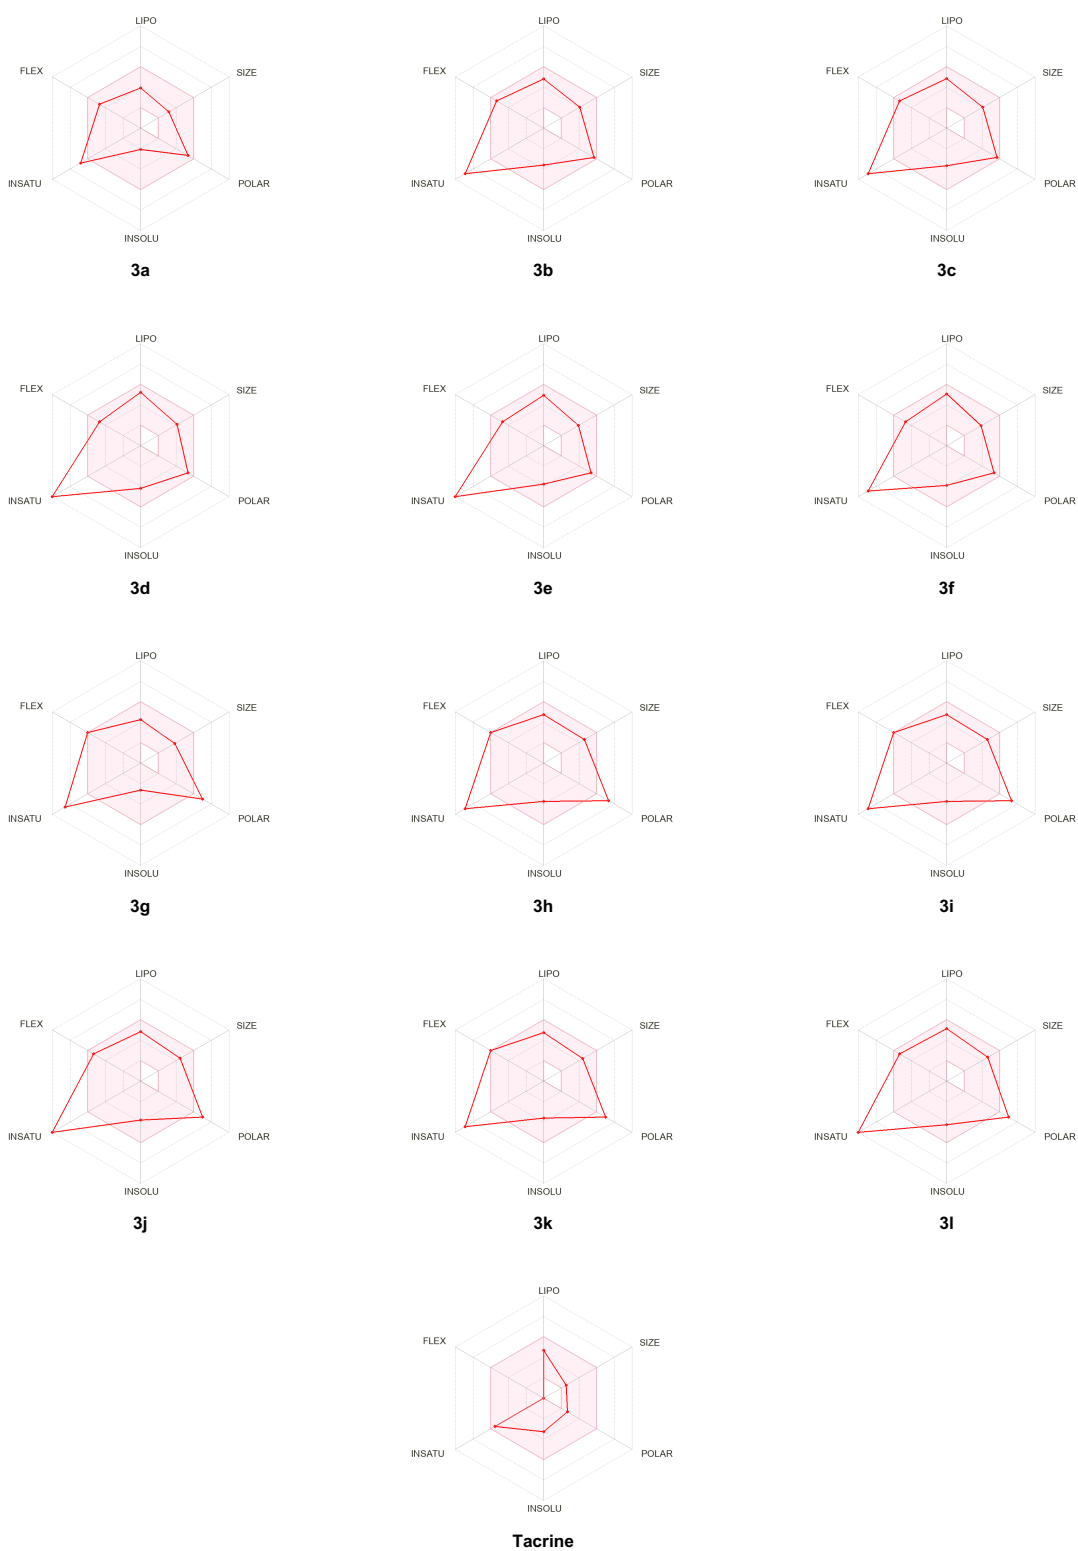

**Fig. S1.** Diagrams showing 'drug-likeness' descriptors for the novel asymmetric bis(carbothioamides) (3a-l) and clinically used reference inhibitor tacrine. The red-colored zone has been identified as a feasible physicochemical domain to enhance oral bioavailability. LIPO, lipophilicity; SIZE, molecular weight; POLAR, polarity; INSOLU, insolubility; INSATU, saturation; and FLEX, flexibility.

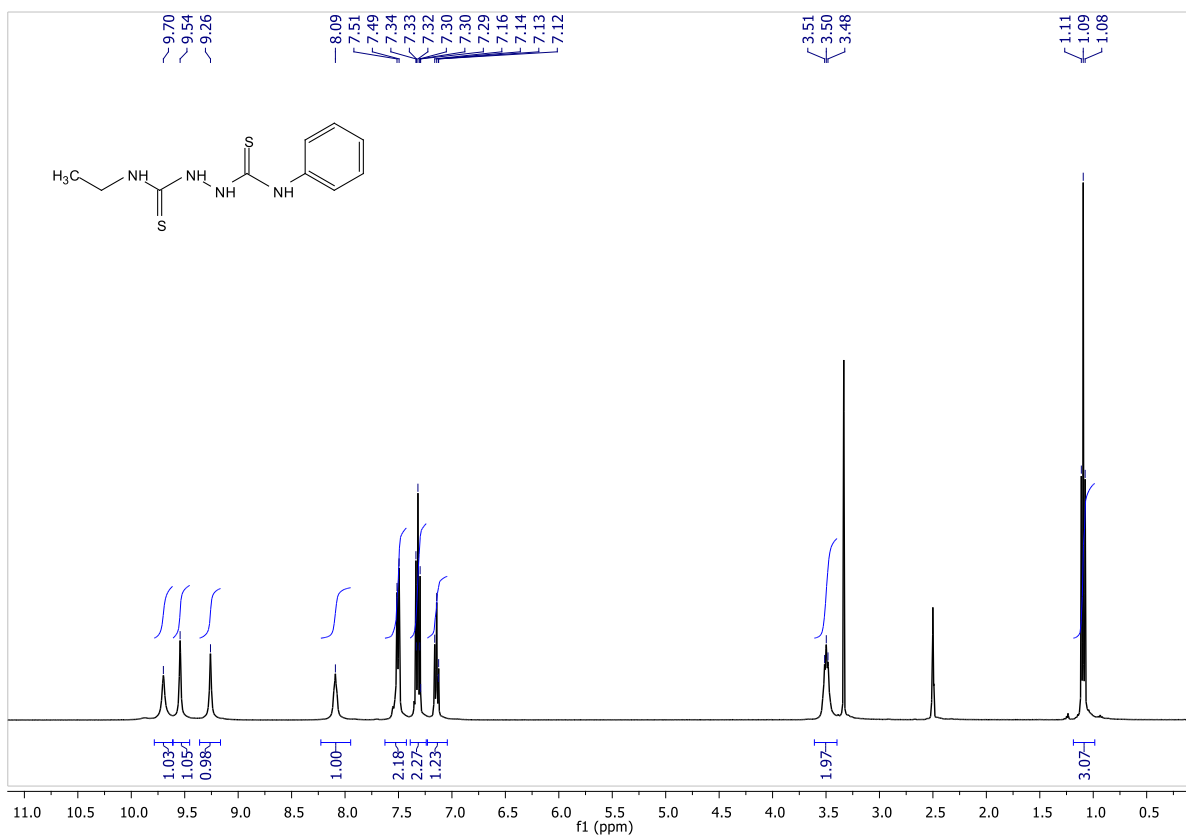

**Fig. S2.**  $^1\text{H}$ -NMR (400 MHz,  $\text{DMSO-d}_6$ ) spectra of compound **3a** ( $N^1$ -ethyl- $N^2$ -phenylhydrazine-1,2-bis(carbothioamide)).

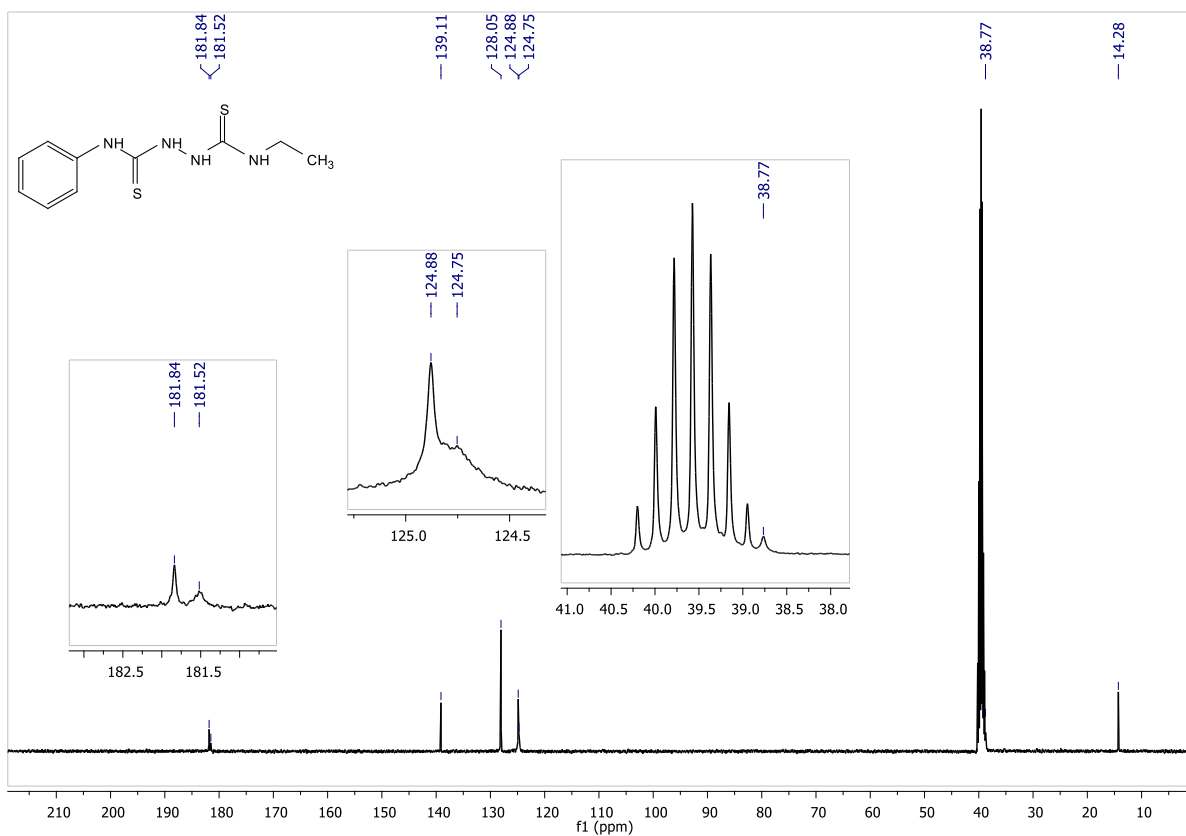

**Fig. S3.** <sup>13</sup>C-NMR (100 MHz, DMSO-*d*<sub>6</sub>) spectra of compound **3a** (*N*<sup>1</sup>-ethyl-*N*<sup>2</sup>-phenylhydrazine-1,2-bis(carbothioamide)).

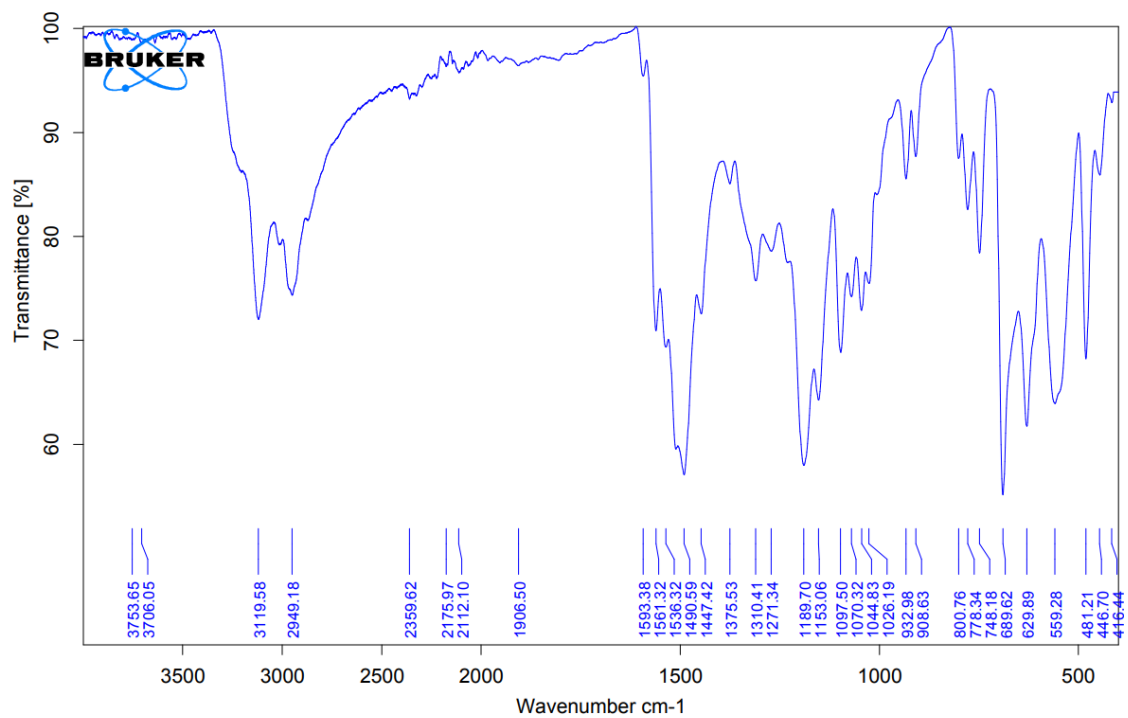

**Fig. S4.** FT-IR spectra of compound **3a** (*N*<sup>1</sup>-ethyl-*N*<sup>2</sup>-phenylhydrazine-1,2-bis(carbothioamide)).

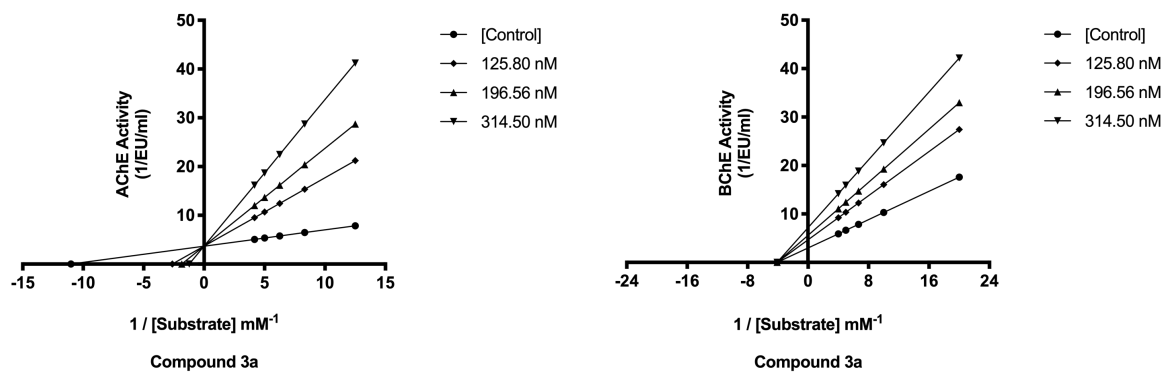

**Fig. S5.** Lineweaver-Burk plots of compound **3a** (*N*<sup>1</sup>-ethyl-*N*<sup>2</sup>-phenylhydrazine-1,2-bis(carbothioamide)).

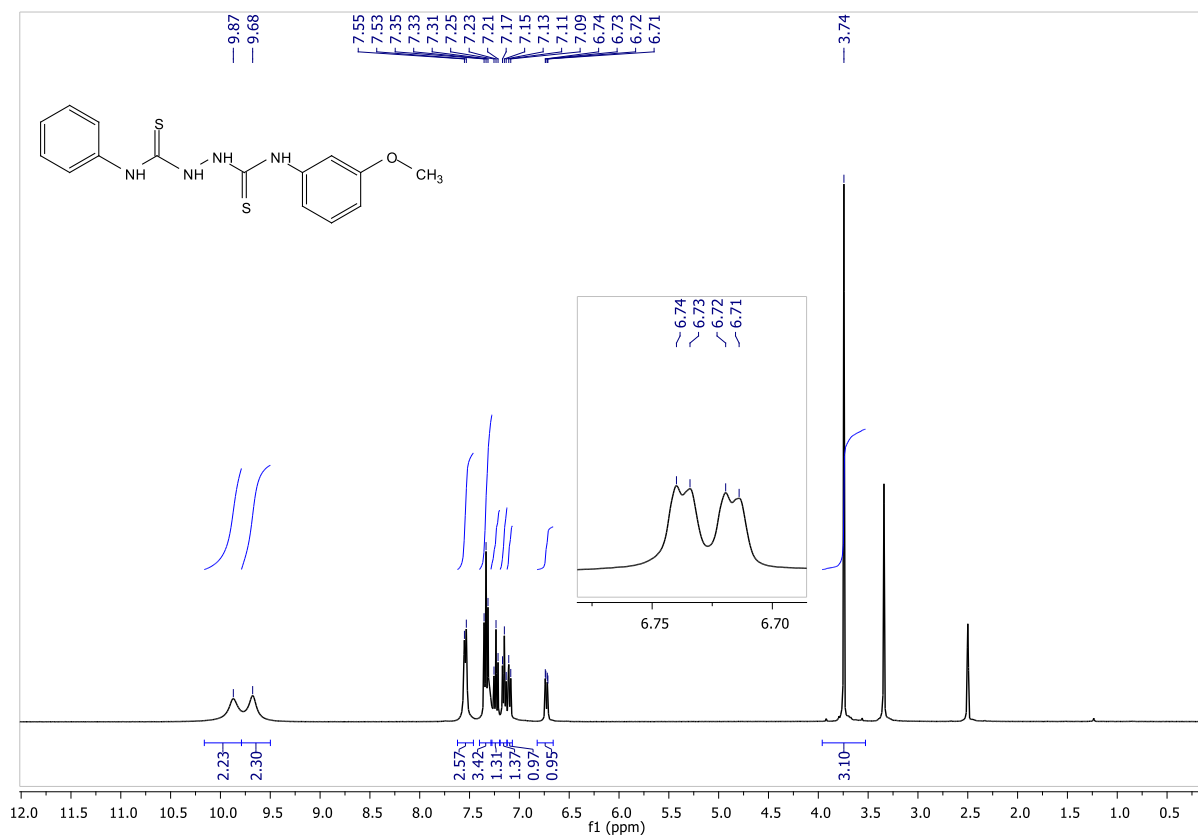

**Fig. S6.**  $^1\text{H-NMR}$  (400 MHz,  $\text{DMSO-}d_6$ ) spectra of compound **3b** ( $N^1$ -(3-methoxyphenyl)- $N^2$ -phenylhydrazine-1,2-bis(carbothioamide)).

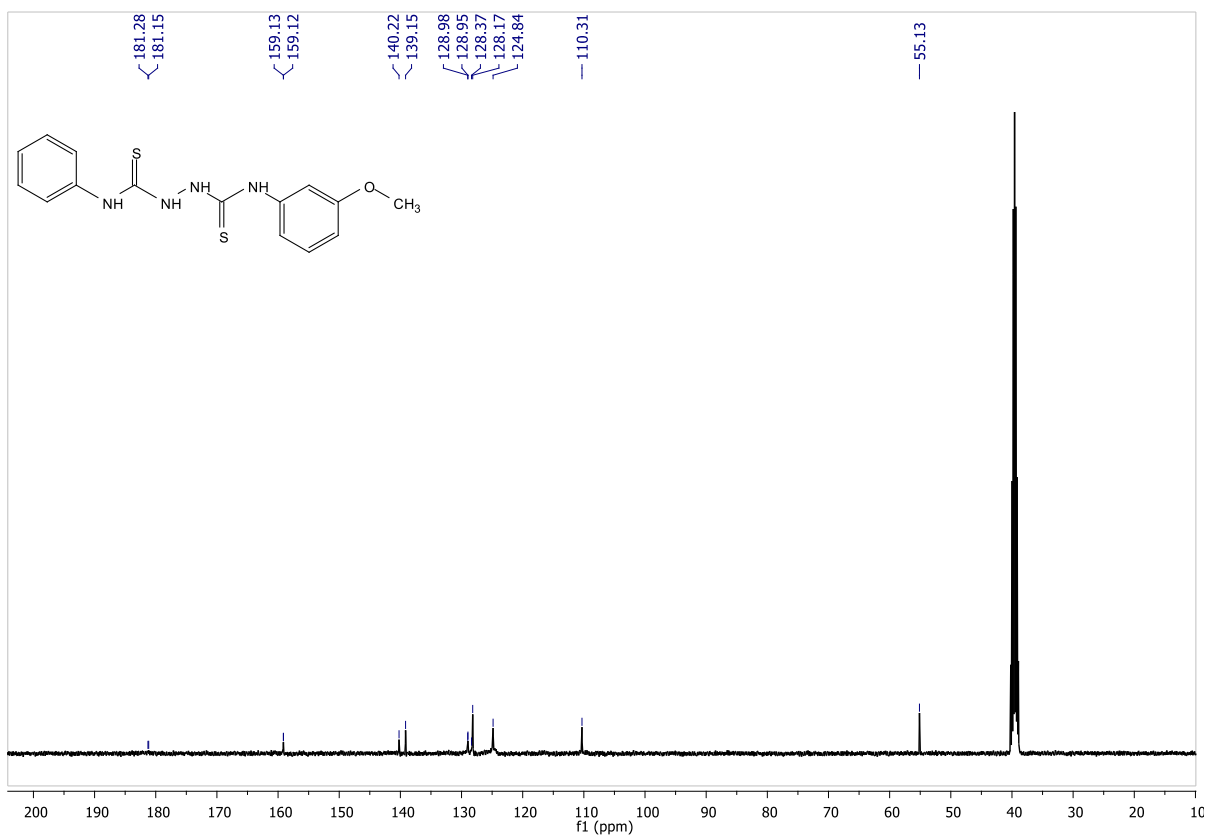

**Fig. S7.** <sup>13</sup>C-NMR (100 MHz, DMSO-*d*<sub>6</sub>) spectra of compound **3b** (*N*<sup>1</sup>-(3-methoxyphenyl)-*N*<sup>2</sup>-phenylhydrazine-1,2-bis(carbothioamide)).



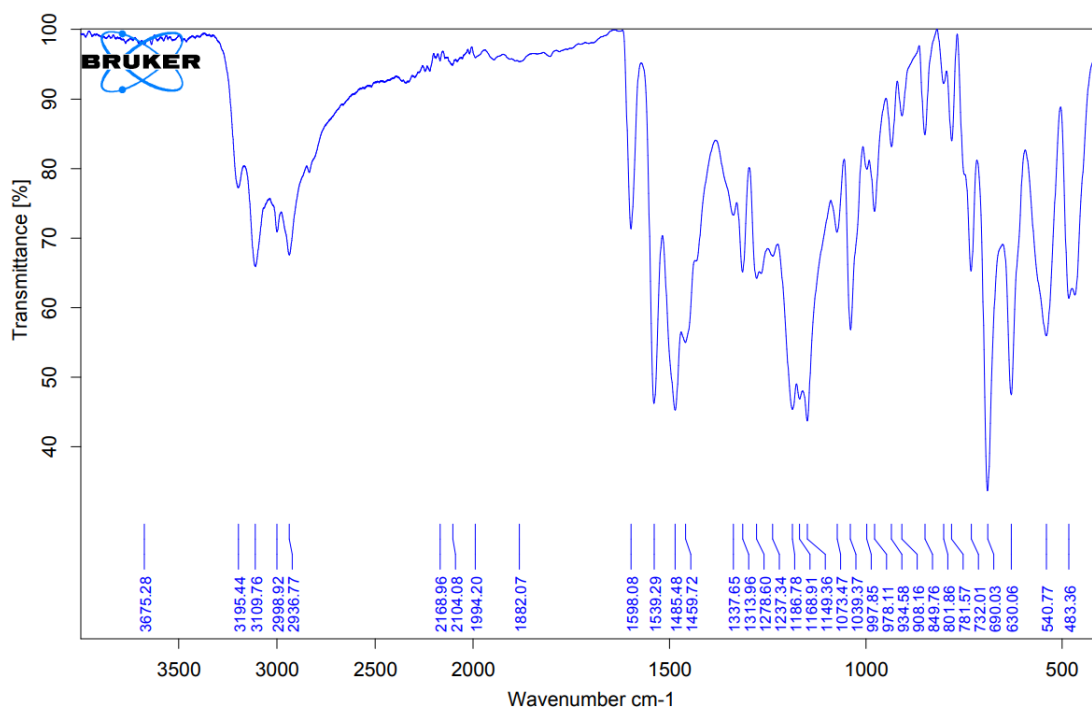

**Fig. S8.** FT-IR spectra of compound **3b** (*N*<sup>1</sup>-(3-methoxyphenyl)-*N*<sup>2</sup>-phenylhydrazine-1,2-bis(carbothioamide)).

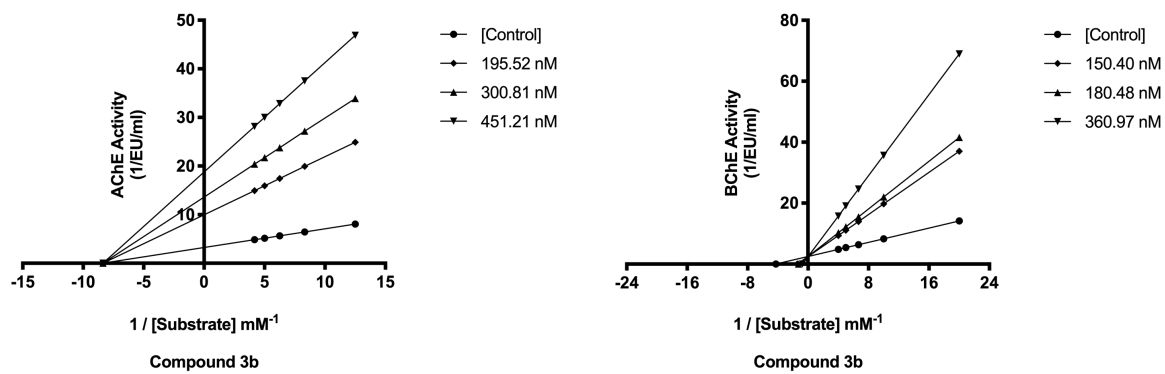

**Fig. S9.** Lineweaver-Burk plots of compound **3b** (*N*<sup>1</sup>-(3-methoxyphenyl)-*N*<sup>2</sup>-phenylhydrazine-1,2-bis(carbothioamide)).

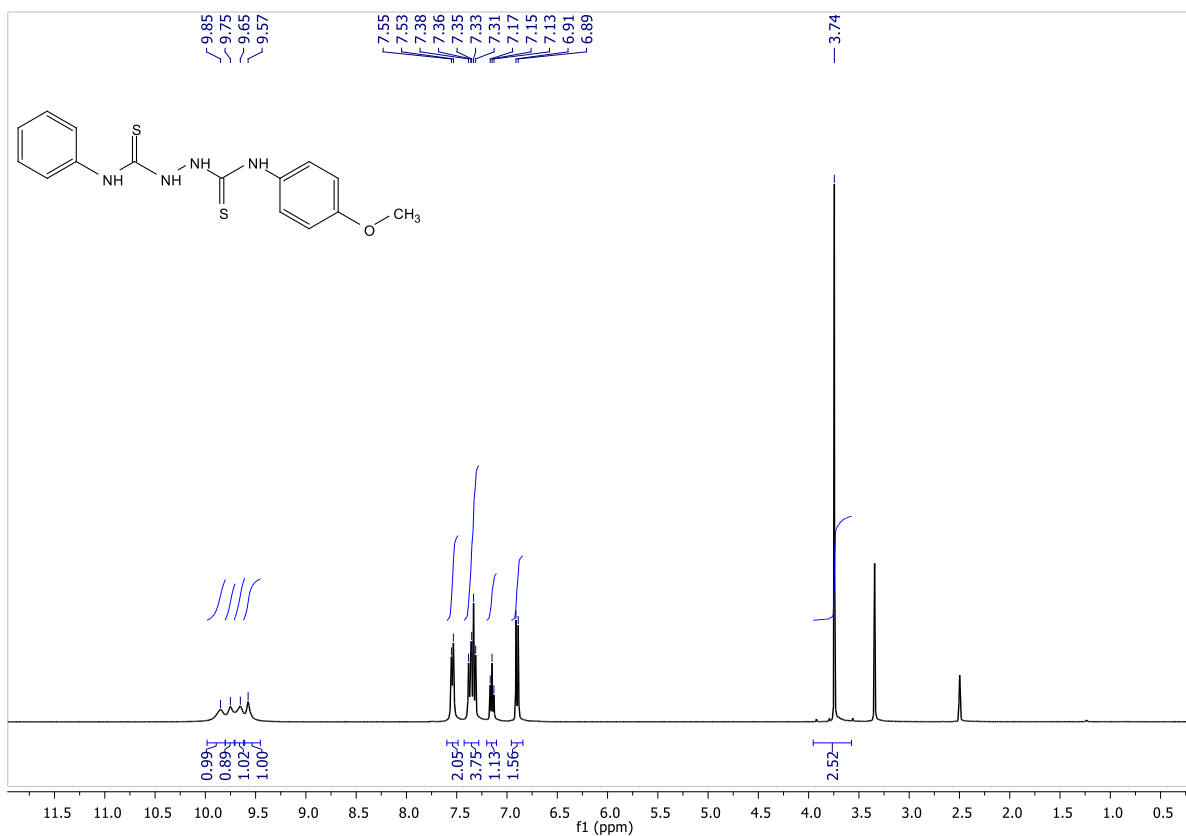

**Fig. S10.** <sup>1</sup>H-NMR (400 MHz, DMSO-*d*<sub>6</sub>) spectra of compound **3c** (*N*<sup>1</sup>-(4-methoxyphenyl)-*N*<sup>2</sup>-phenylhydrazine-1,2-bis(carbothioamide)).

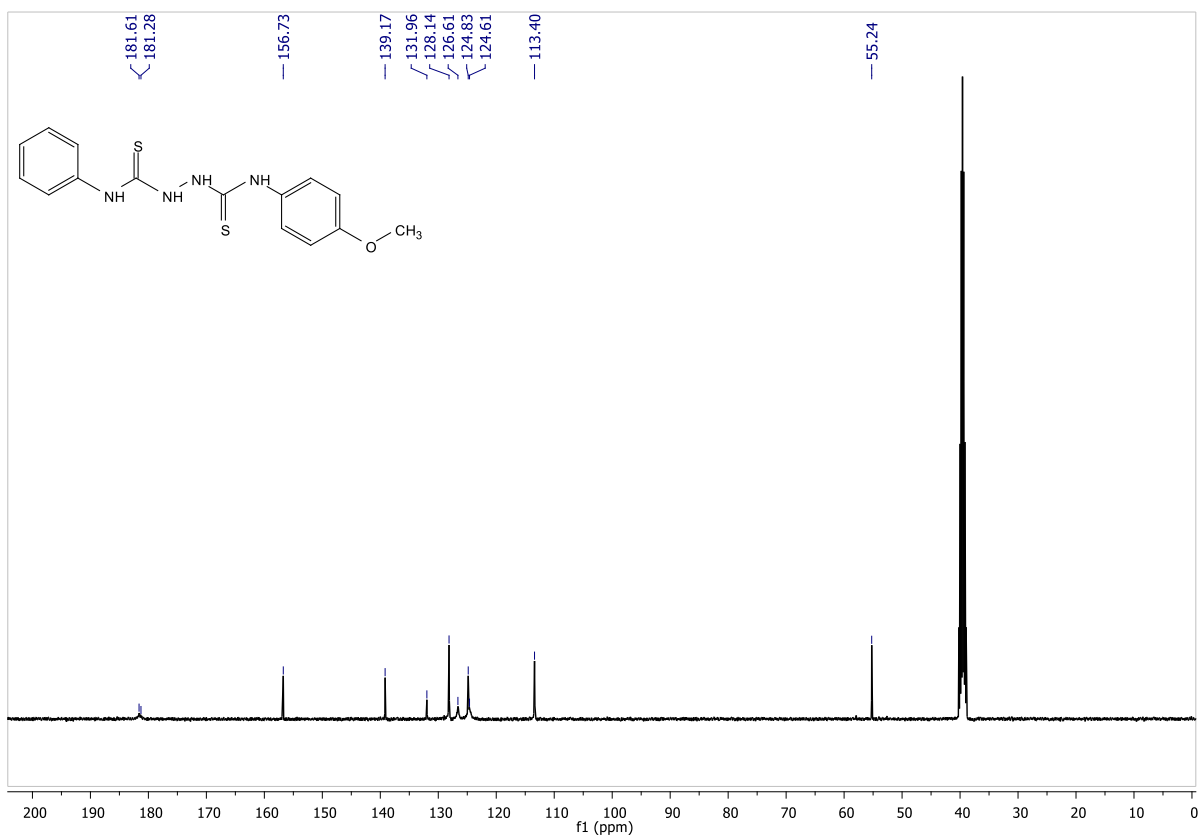

**Fig. S11.** <sup>13</sup>C-NMR (100 MHz, DMSO-*d*<sub>6</sub>) spectra of compound **3c** (*N*<sup>1</sup>-(4-methoxyphenyl)-*N*<sup>2</sup>-phenylhydrazine-1,2-bis(carbothioamide)).

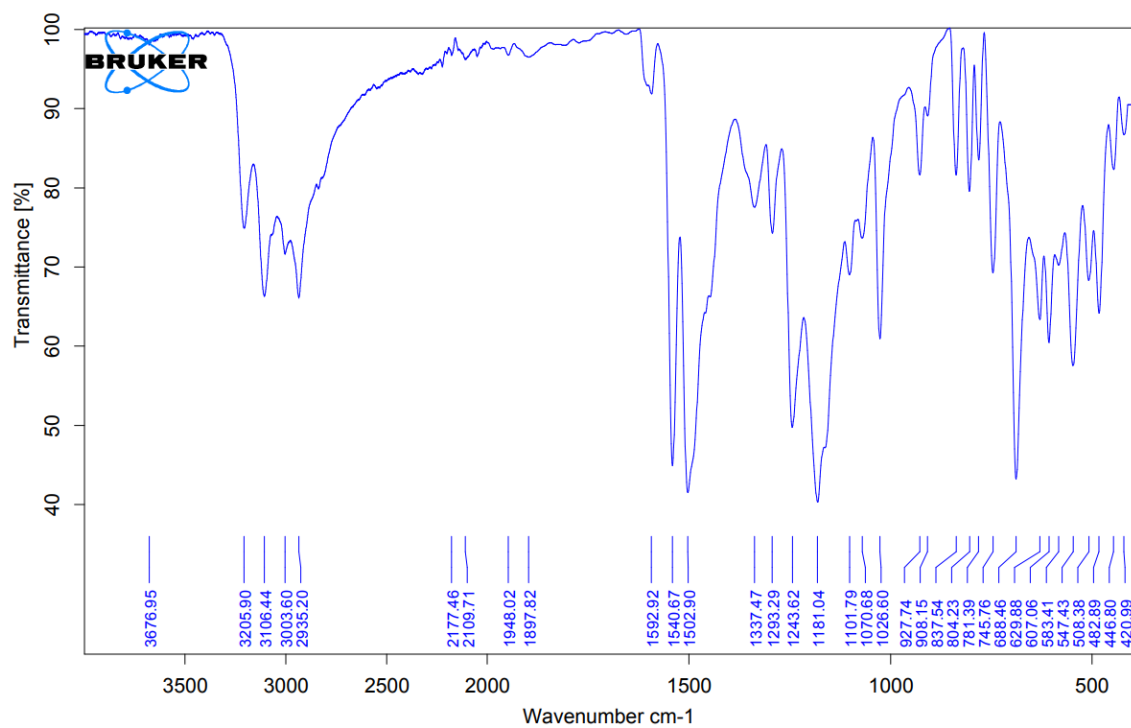

**Fig. S12.** FT-IR spectra of compound **3c** (*N*<sup>1</sup>-(4-methoxyphenyl)-*N*<sup>2</sup>-phenylhydrazine-1,2-bis(carbothioamide)).

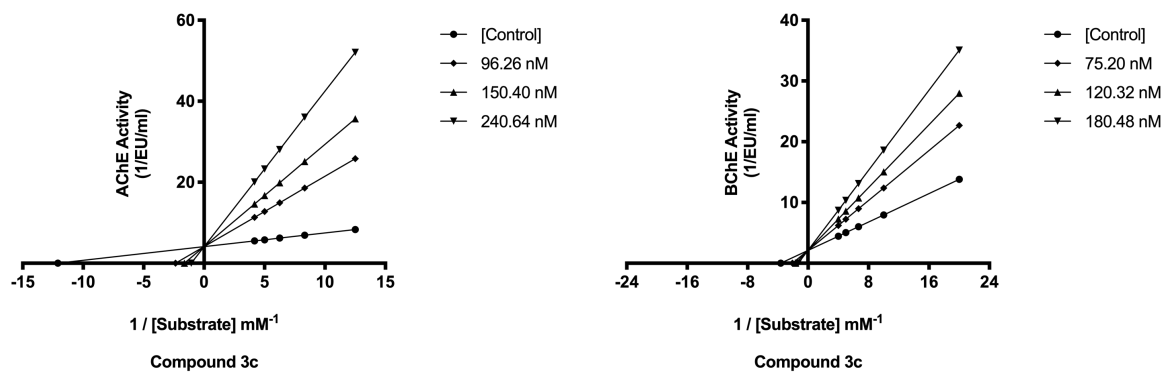

**Fig. S13.** Lineweaver-Burk plots of compound **3c** (*N*<sup>1</sup>-(4-methoxyphenyl)-*N*<sup>2</sup>-phenylhydrazine-1,2-bis(carbothioamide)).

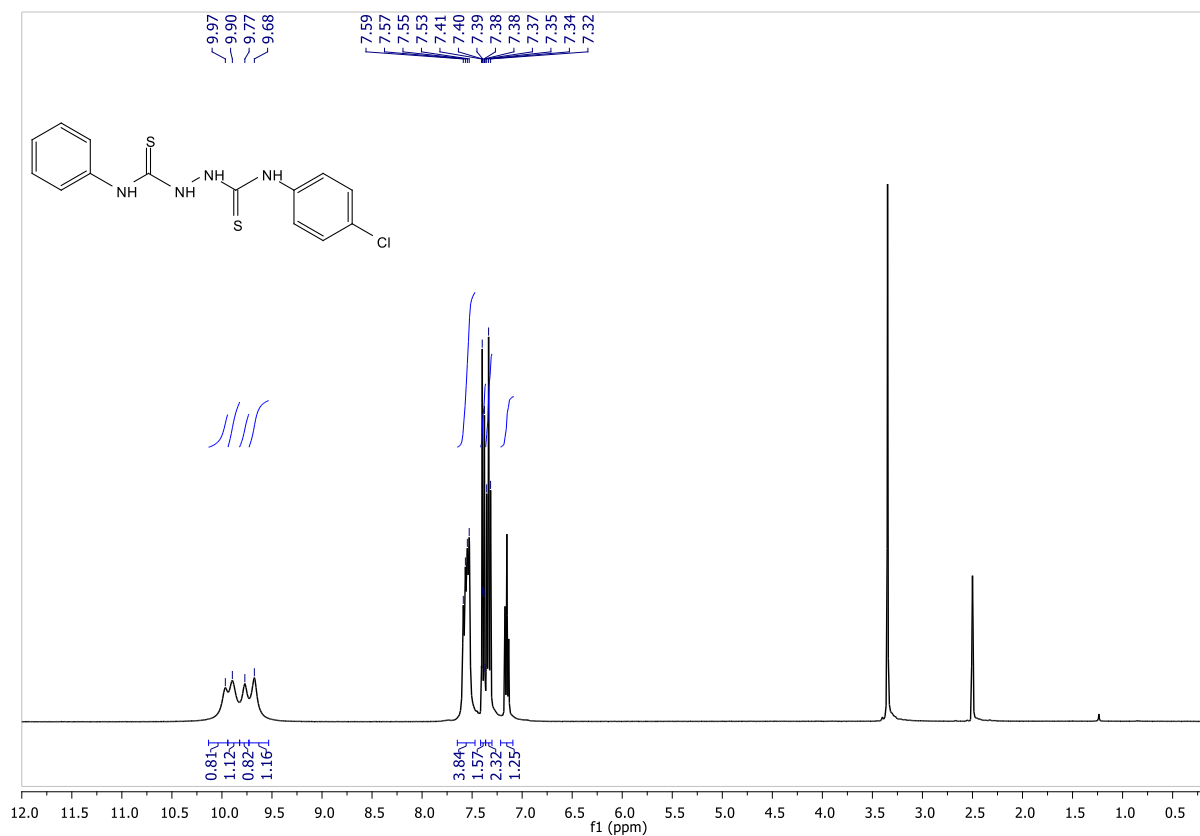

**Fig. S14.**  $^1\text{H-NMR}$  (400 MHz,  $\text{DMSO-}d_6$ ) spectra of compound **3d** ( $N^1$ -(4-chlorophenyl)- $N^2$ -phenylhydrazine-1,2-bis(carbothioamide)).

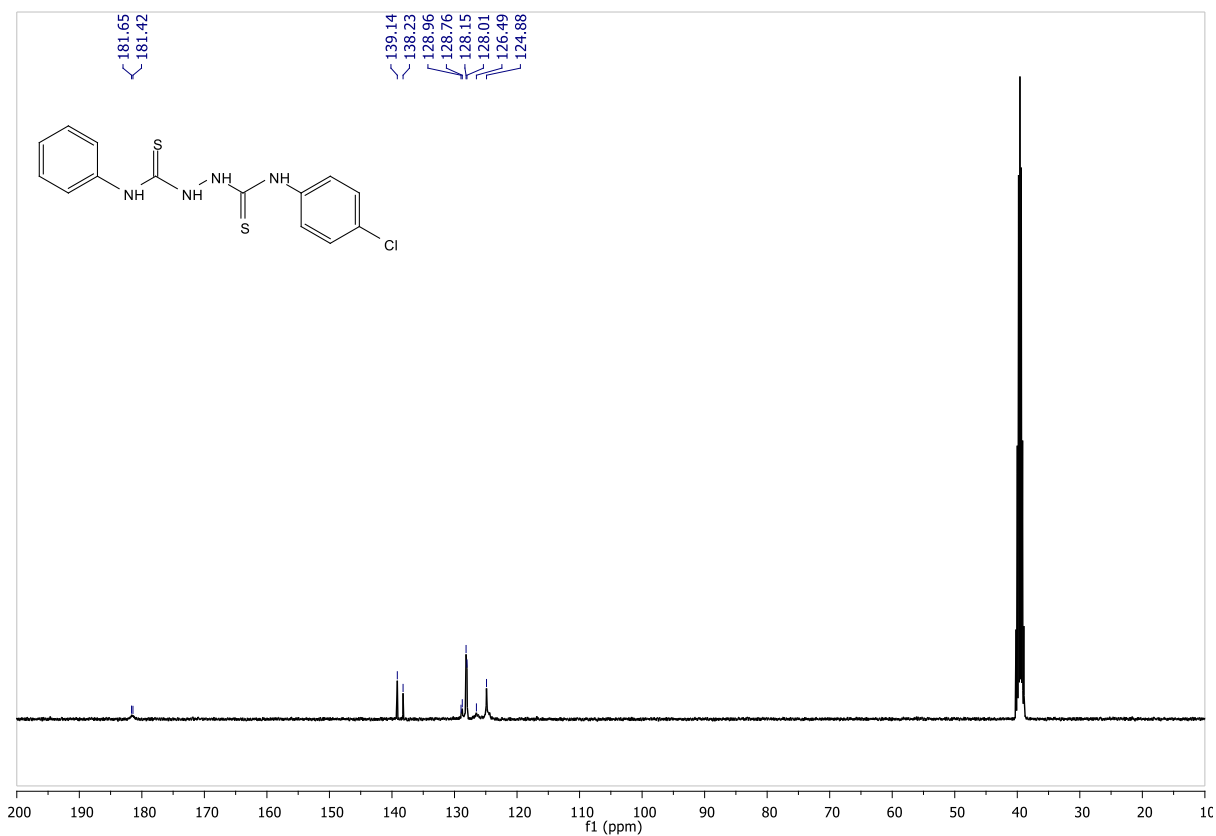

**Fig. S15.** <sup>13</sup>C-NMR (100 MHz, DMSO-*d*<sub>6</sub>) spectra of compound **3d** (*N*<sup>1</sup>-(4-chlorophenyl)-*N*<sup>2</sup>-phenylhydrazine-1,2-bis(carbothioamide)).



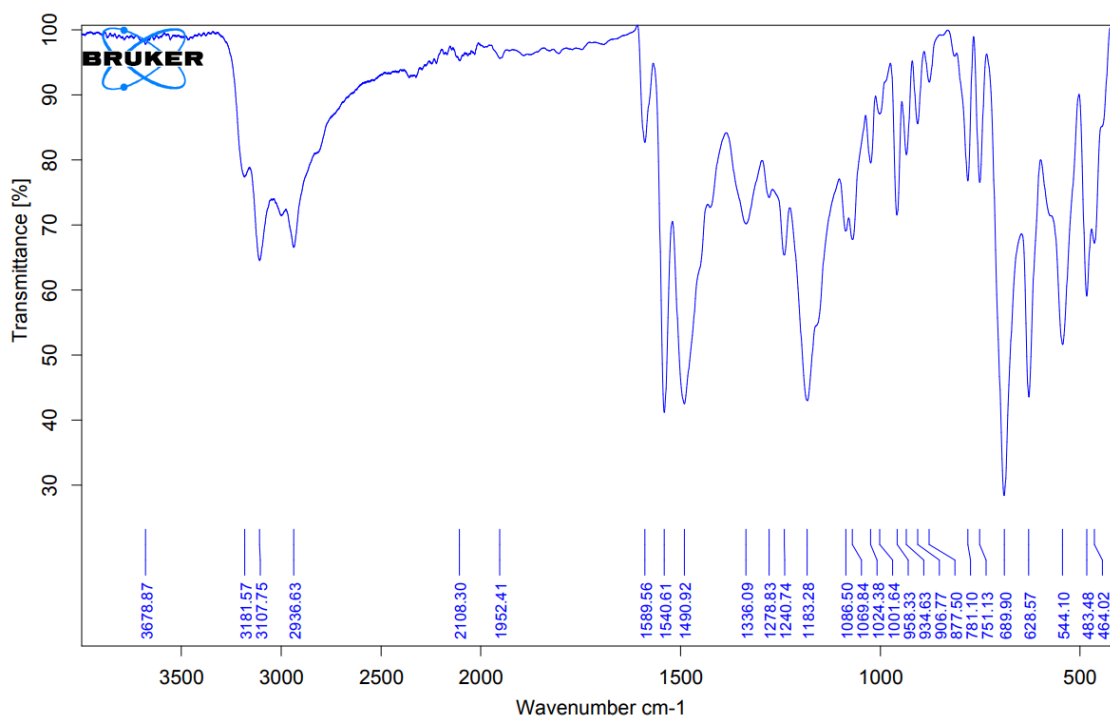

**Fig. S16.** FT-IR spectra of compound **3d** (*N*<sup>1</sup>-(4-chlorophenyl)-*N*<sup>2</sup>-phenylhydrazine-1,2-bis(carbothioamide)).

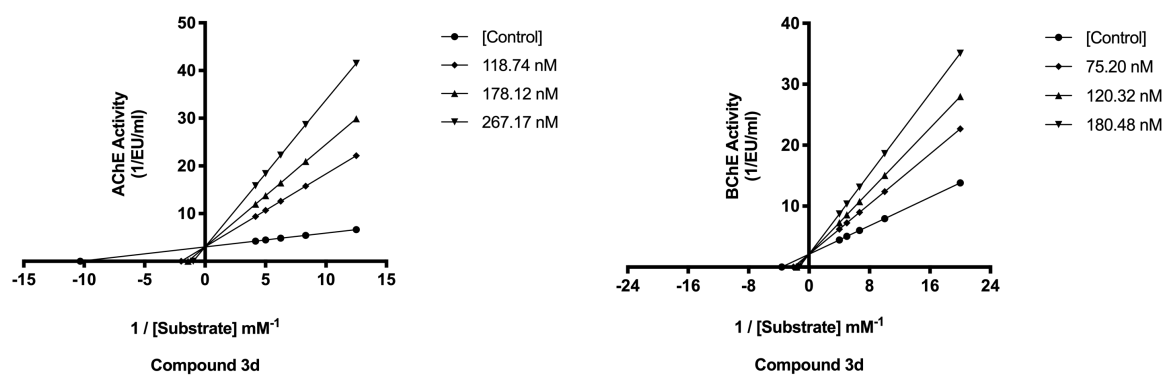

**Fig. S17.** Lineweaver-Burk plots of compound **3d** (*N*<sup>1</sup>-(4-chlorophenyl)-*N*<sup>2</sup>-phenylhydrazine-1,2-bis(carbothioamide)).

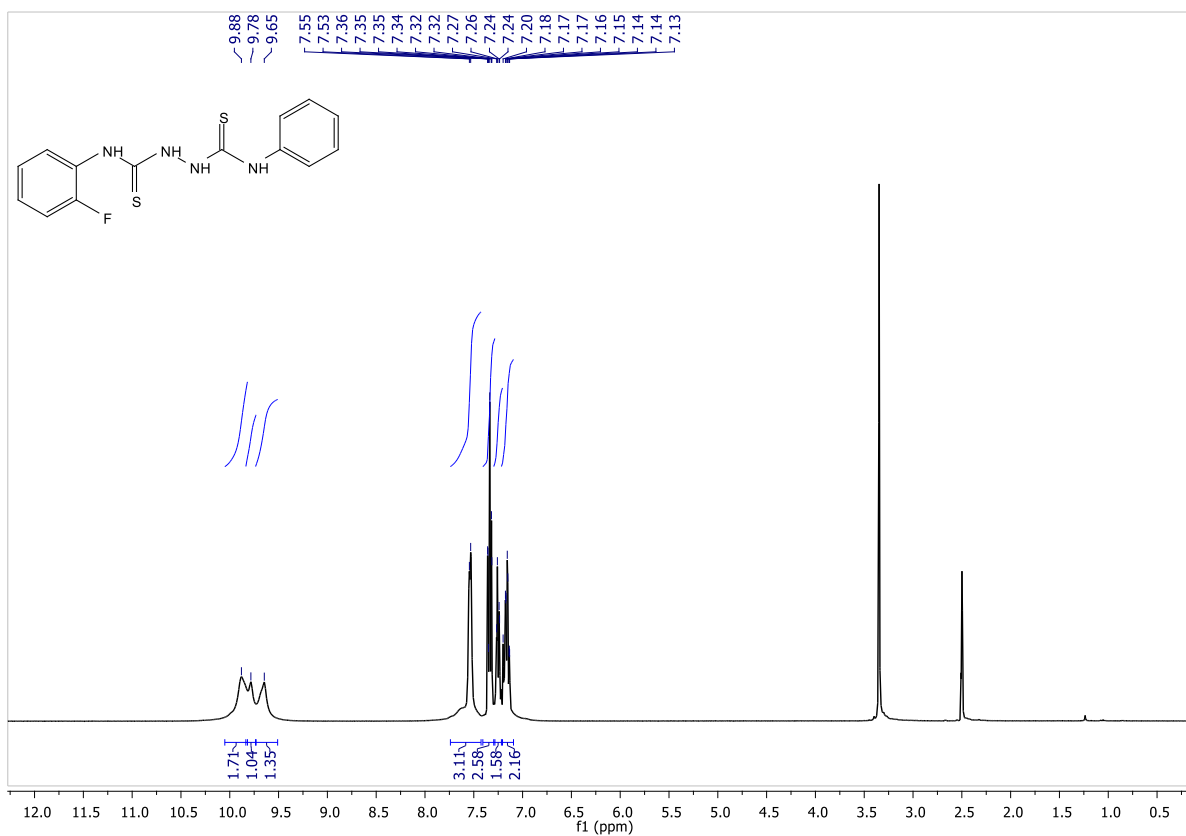

**Fig. S18.** <sup>1</sup>H-NMR (400 MHz, DMSO-*d*<sub>6</sub>) spectra of compound **3e** (*N*<sup>1</sup>-(2-fluorophenyl)-*N*<sup>2</sup>-phenylhydrazine-1,2-bis(carbothioamide)).

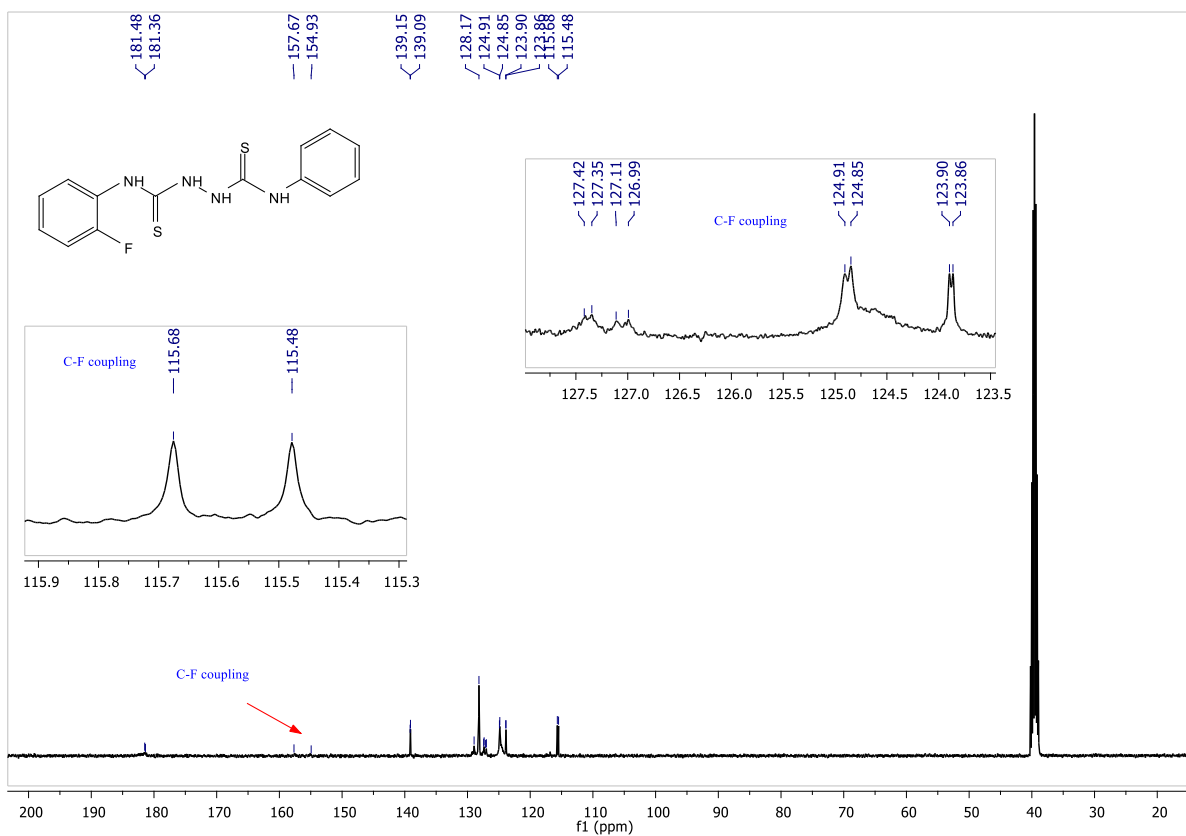

**Fig. S19.**  $^{13}\text{C}$ -NMR (100 MHz,  $\text{DMSO-}d_6$ ) spectra of compound **3e** ( $N^1$ -(2-fluorophenyl)- $N^2$ -phenylhydrazine-1,2-bis(carbothioamide)).

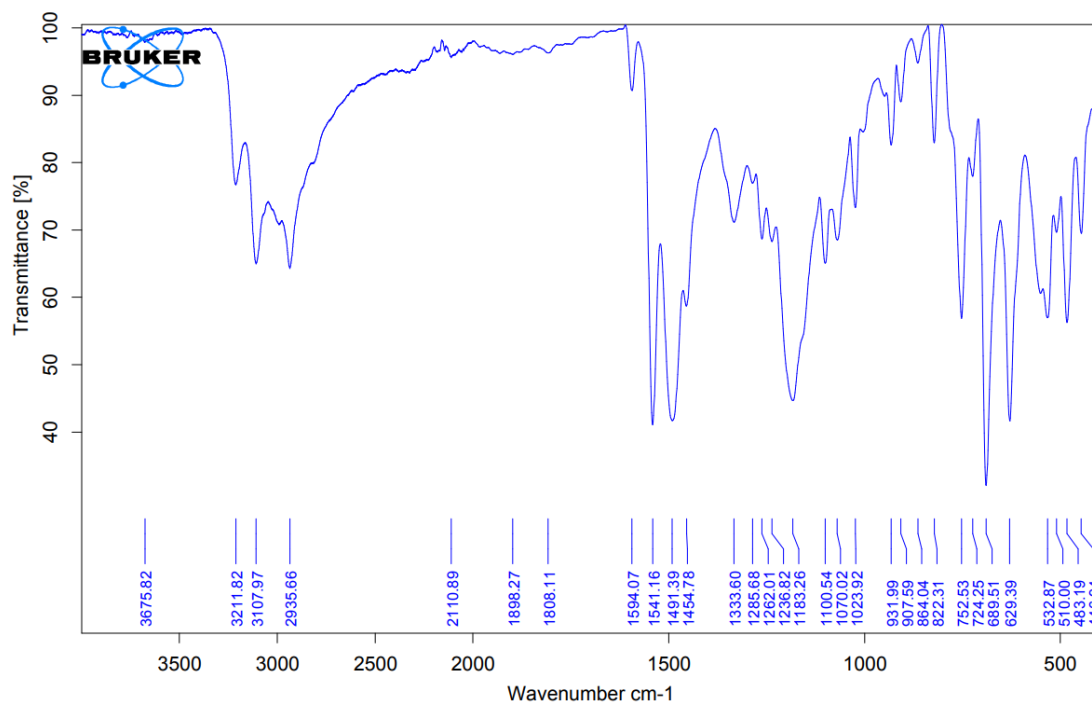

**Fig. S20.** FT-IR spectra of compound **3e** (*N*<sup>1</sup>-(2-fluorophenyl)-*N*<sup>2</sup>-phenylhydrazine-1,2-bis(carbothioamide)).

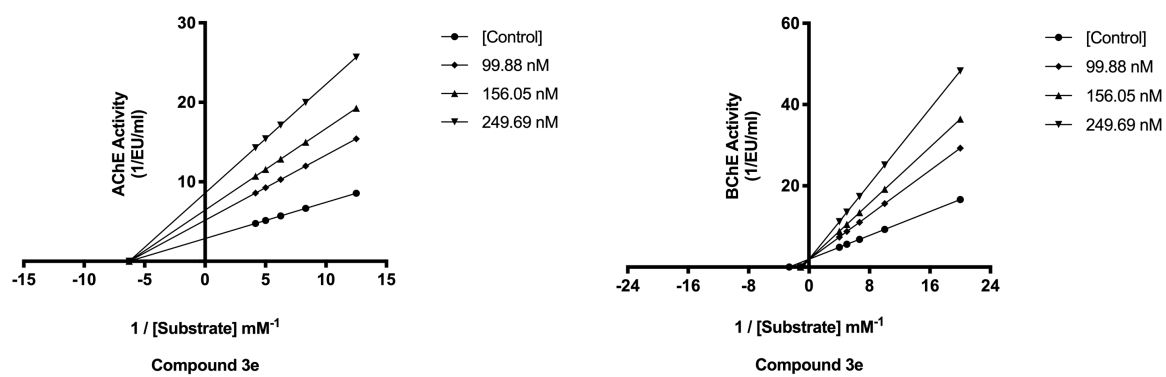

**Fig. S21.** Lineweaver-Burk plots of compound **3e** ( $N^1$ -(2-fluorophenyl)- $N^2$ -phenylhydrazine-1,2-bis(carbothioamide)).

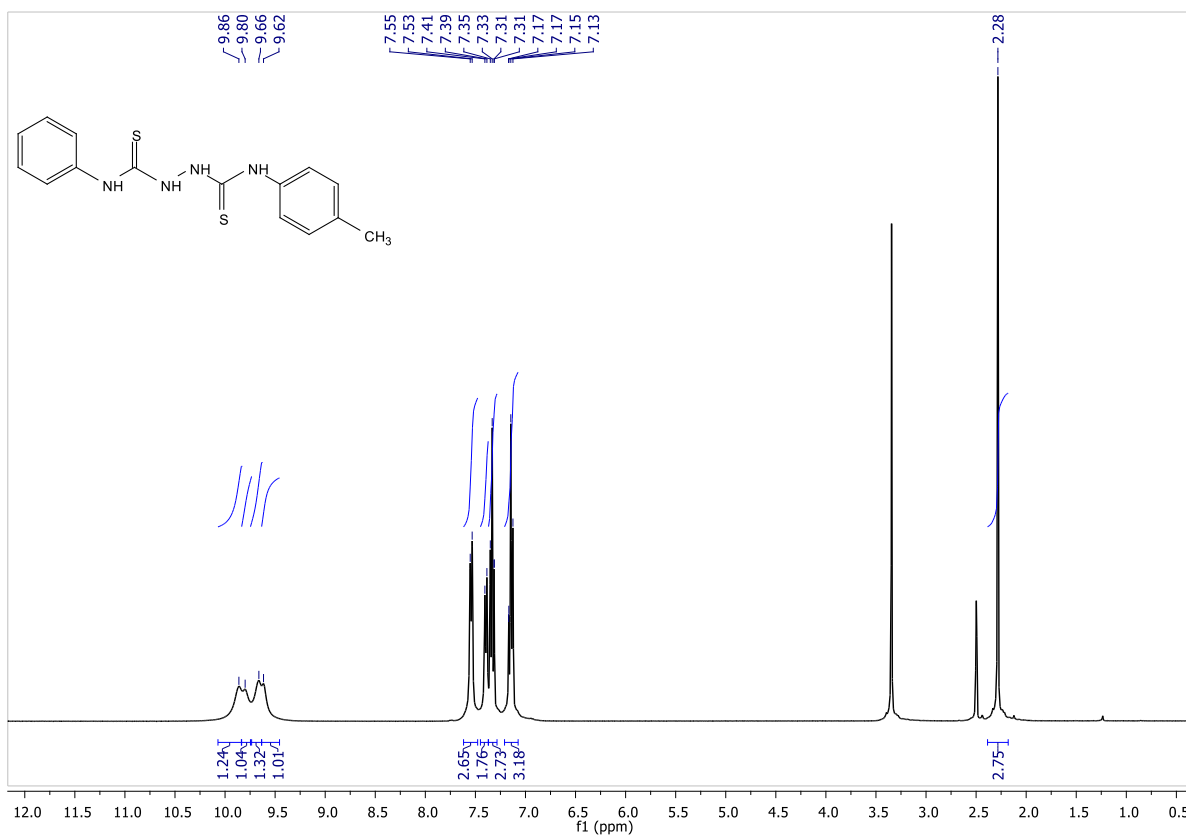

**Fig. S22.**  $^1\text{H-NMR}$  (400 MHz,  $\text{DMSO-}d_6$ ) spectra of compound **3f** ( $N^1$ -phenyl- $N^2$ -(*p*-tolyl)hydrazine-1,2-bis(carbothioamide)).

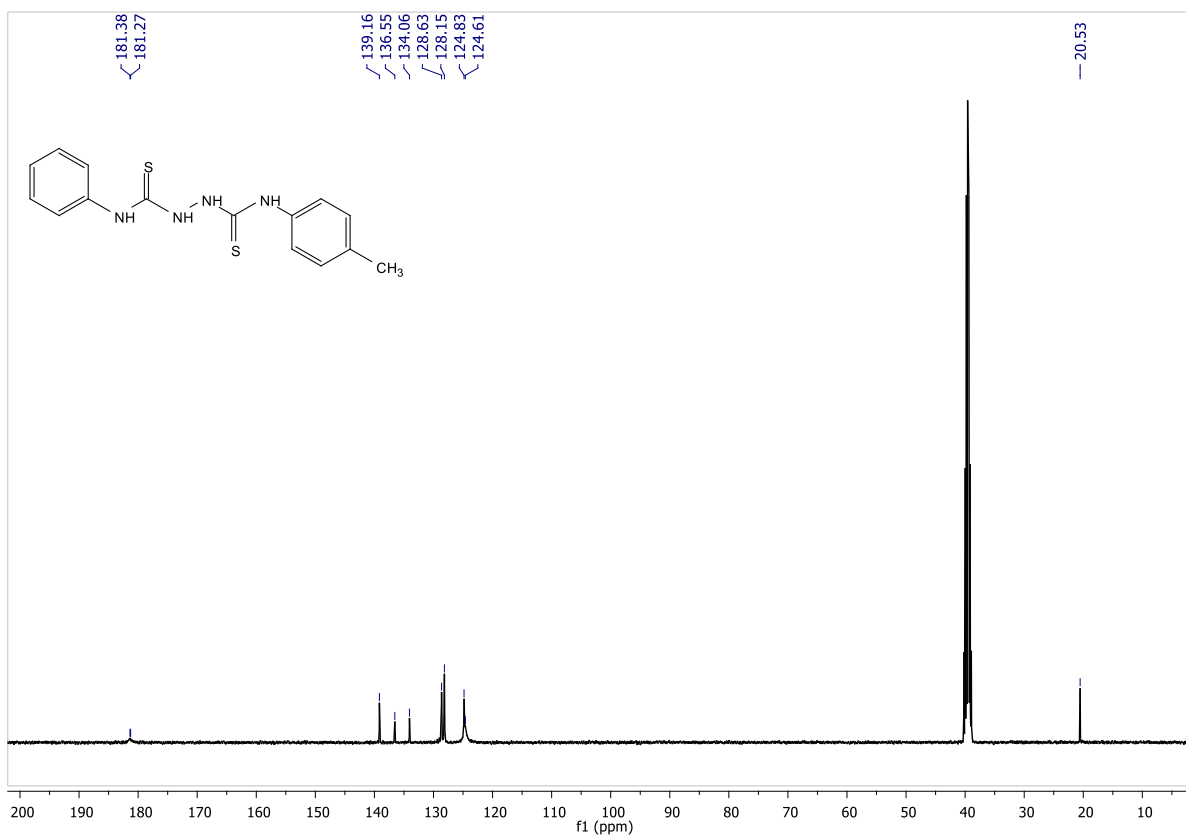

**Fig. S23.** <sup>13</sup>C-NMR (100 MHz, DMSO-*d*<sub>6</sub>) spectra of compound **3f** (*N*<sup>1</sup>-phenyl-*N*<sup>2</sup>-(*p*-tolyl)hydrazine-1,2-bis(carbothioamide)).



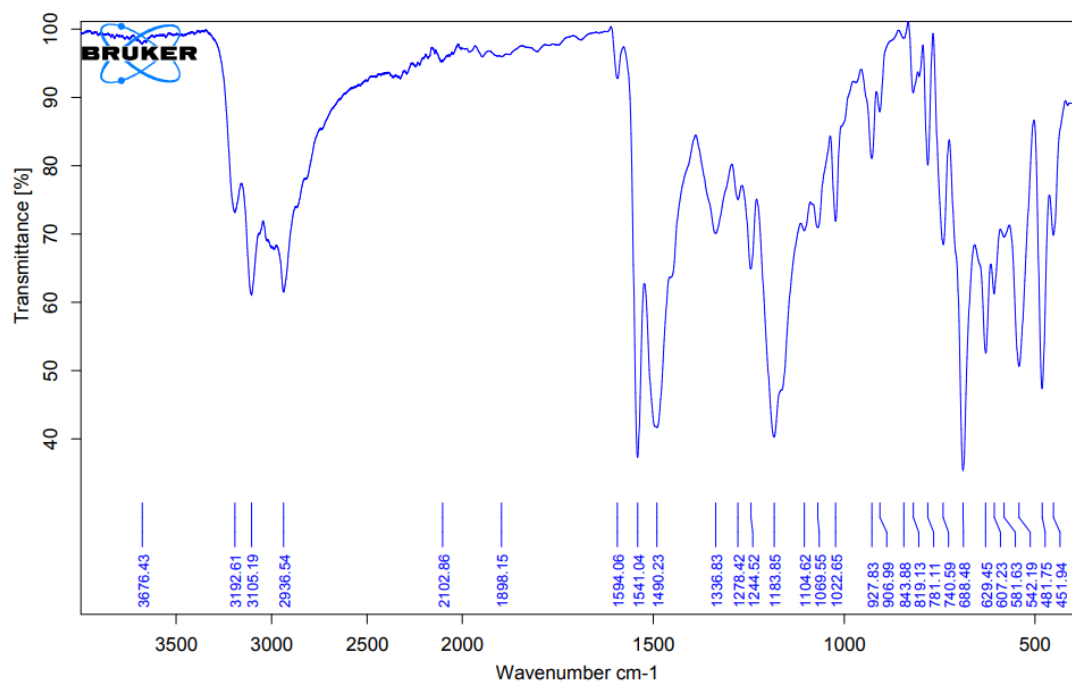

**Fig. S24.** FT-IR spectra of compound **3f** (*N*<sup>1</sup>-phenyl-*N*<sup>2</sup>-(*p*-tolyl)hydrazine-1,2-bis(carbothioamide)).

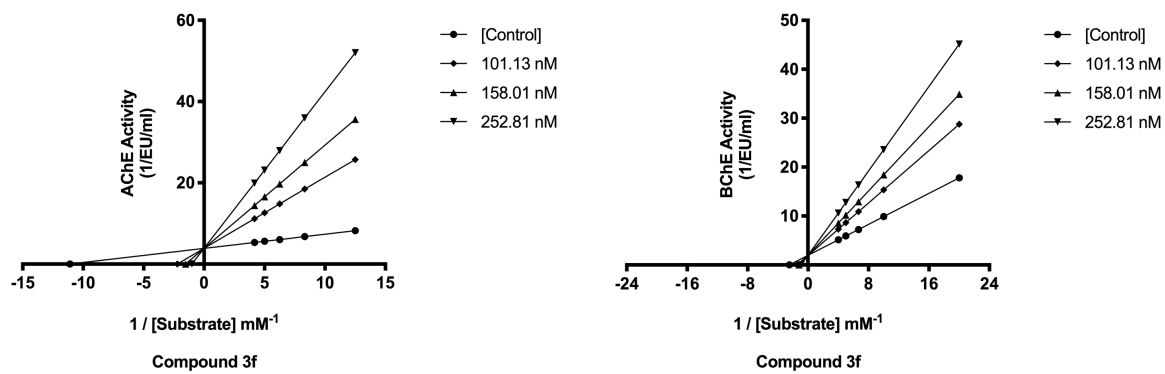

**Fig. S25.** Lineweaver-Burk plots of compound **3f** (*N*<sup>1</sup>-phenyl-*N*<sup>2</sup>-(*p*-tolyl)hydrazine-1,2-bis(carbothioamide)).

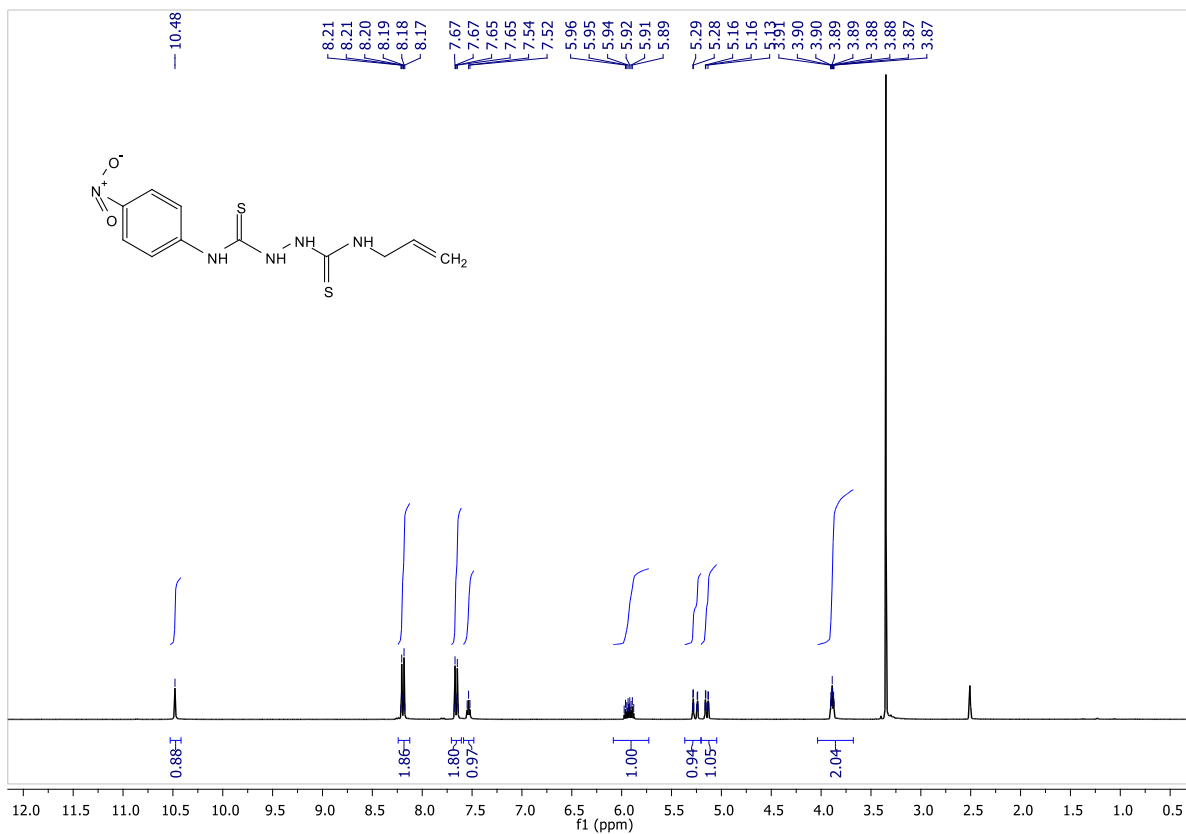

**Fig. S26.**  $^1\text{H-NMR}$  (400 MHz,  $\text{DMSO-}d_6$ ) spectra of compound **3g** ( $N^1$ -allyl- $N^2$ -(4-nitrophenyl)hydrazine-1,2-bis(carbothioamide)).

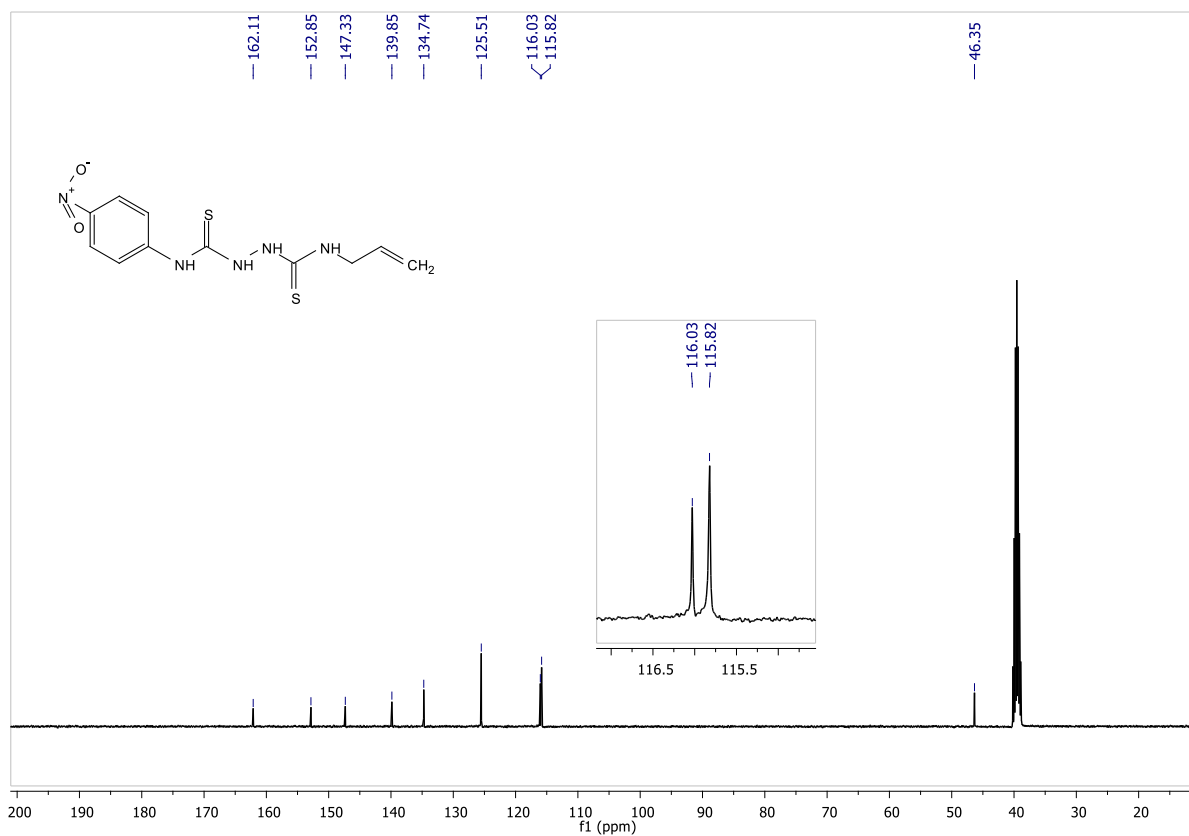

**Fig. S27.** <sup>13</sup>C-NMR (100 MHz, DMSO-*d*<sub>6</sub>) spectra of compound **3g** (*N*<sup>1</sup>-allyl-*N*<sup>2</sup>-(4-nitrophenyl)hydrazine-1,2-bis(carbothioamide)).

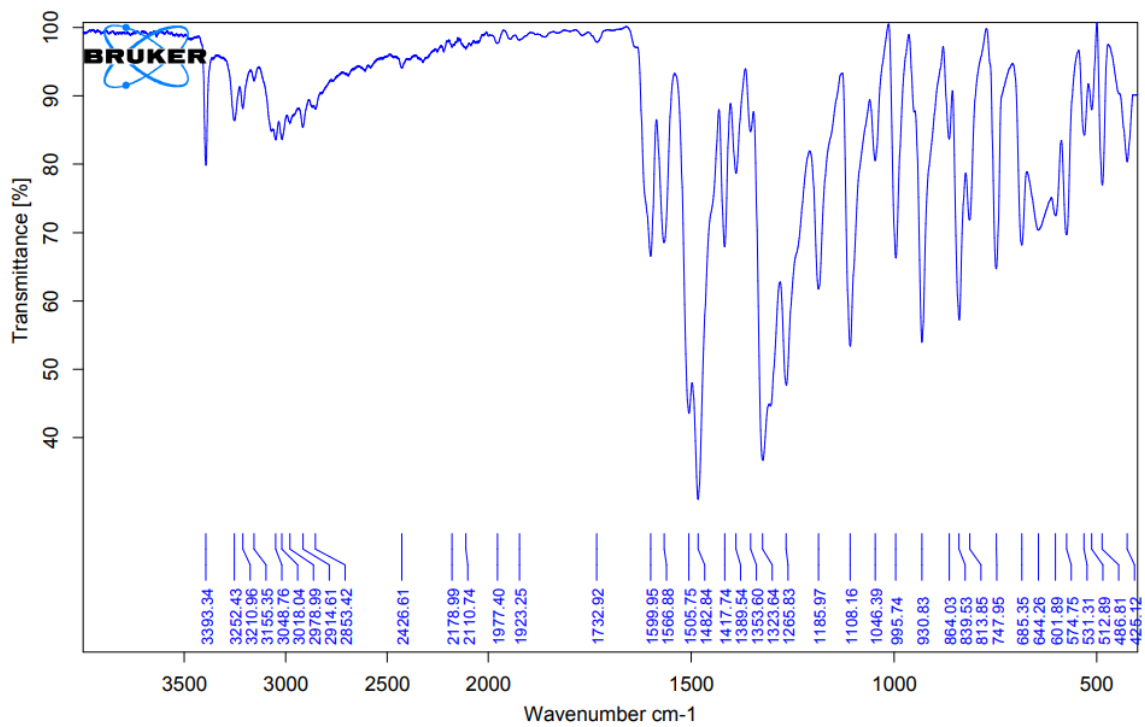

Fig. S28. FT-IR spectra of compound **3g** (*N*<sup>1</sup>-allyl-*N*<sup>2</sup>-(4-nitrophenyl)hydrazine-1,2-bis(carbothioamide)).

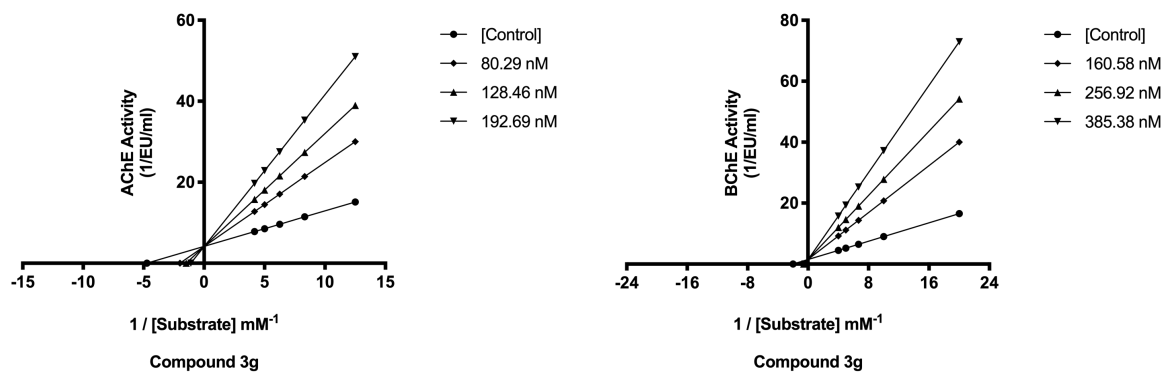

**Fig. S29.** Lineweaver-Burk plots of compound **3g** (*N*<sup>1</sup>-allyl-*N*<sup>2</sup>-(4-nitrophenyl)hydrazine-1,2-bis(carbothioamide)).

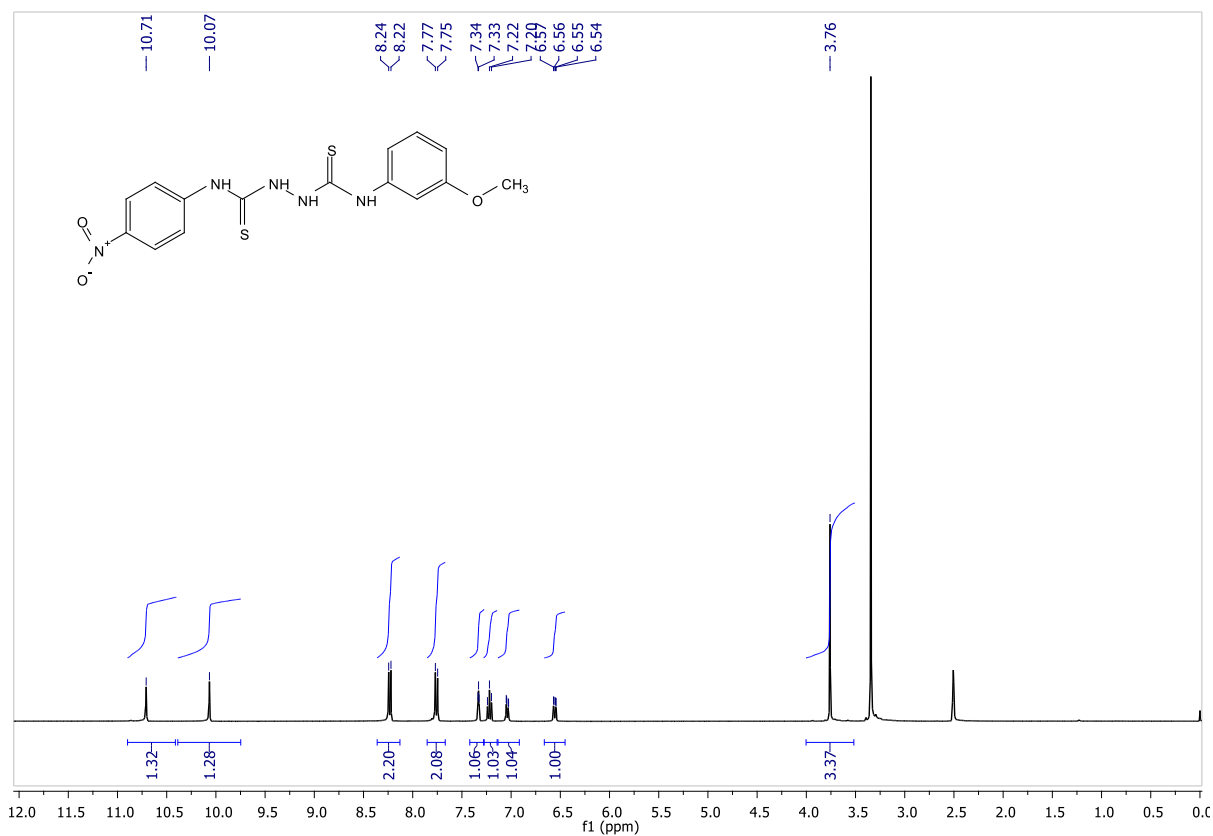

**Fig. S30.**  $^1\text{H-NMR}$  (400 MHz,  $\text{DMSO-}d_6$ ) spectra of compound **3h** ( $N^1$ -(3-methoxyphenyl)- $N^2$ -(4-nitrophenyl)hydrazine-1,2-bis(carbothioamide)).

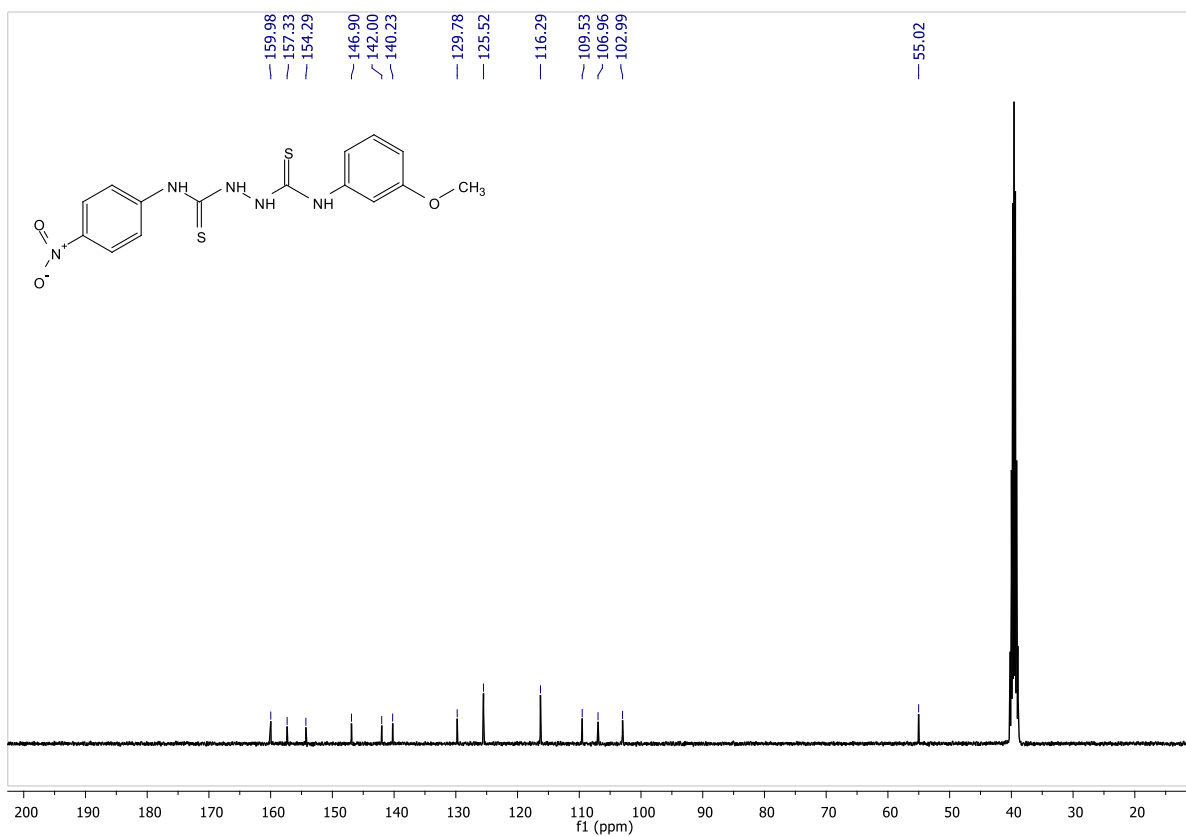

**Fig. S31.** <sup>13</sup>C-NMR (100 MHz, DMSO-*d*<sub>6</sub>) spectra of compound **3h** (*N*<sup>1</sup>-(3-methoxyphenyl)-*N*<sup>2</sup>-(4-nitrophenyl)hydrazine-1,2-bis(carbothioamide)).



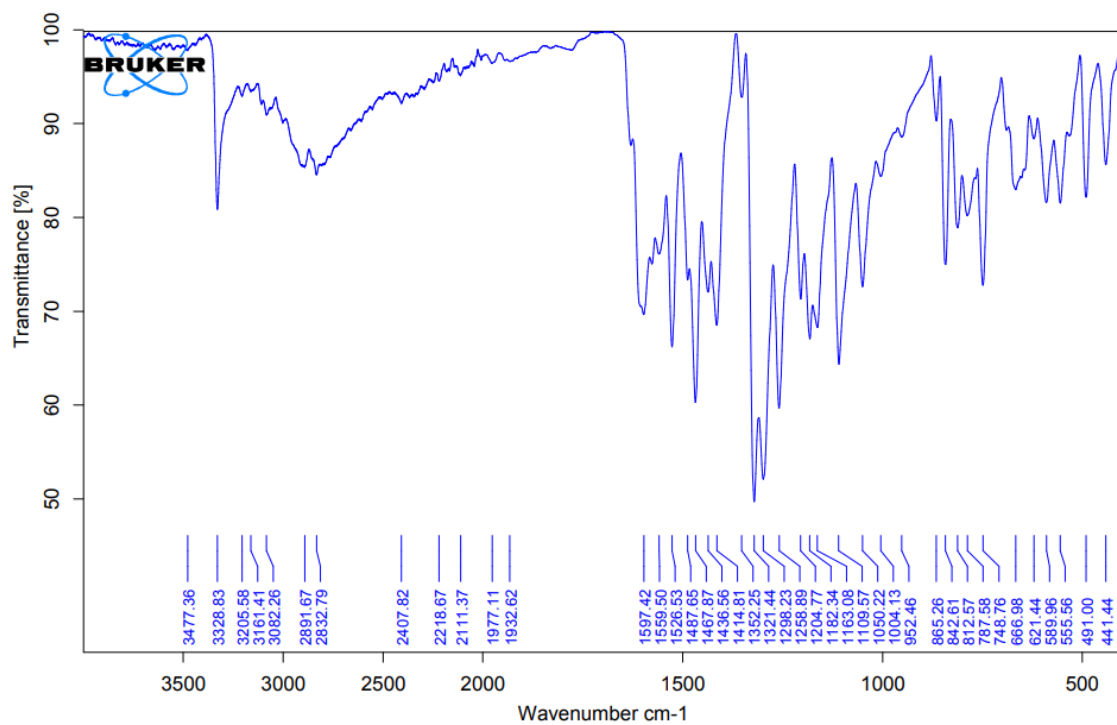

**Fig. S32.** FT-IR spectra of compound **3h** (*N*<sup>1</sup>-(3-methoxyphenyl)-*N*<sup>2</sup>-(4-nitrophenyl)hydrazine-1,2-bis(carbothioamide)).

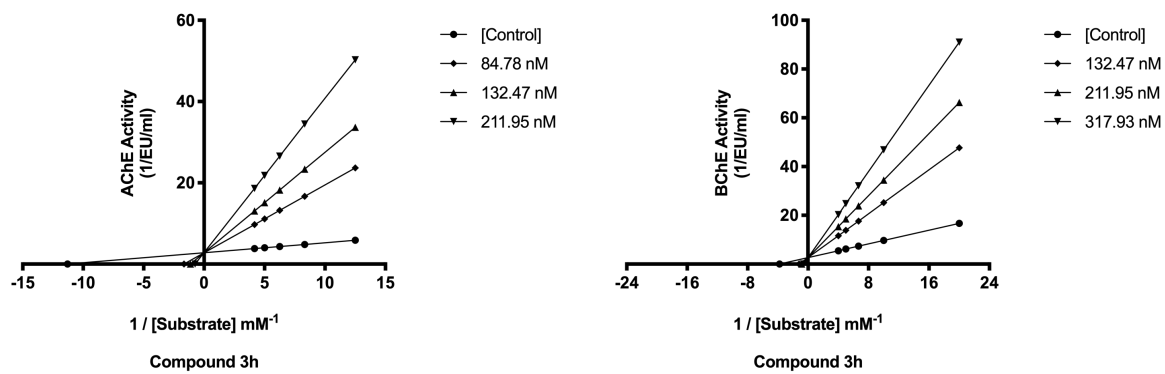

**Fig. S33.** Lineweaver-Burk plots of compound **3h** (*N*<sup>1</sup>-(3-methoxyphenyl)-*N*<sup>2</sup>-(4-nitrophenyl)hydrazine-1,2-bis(carbothioamide)).

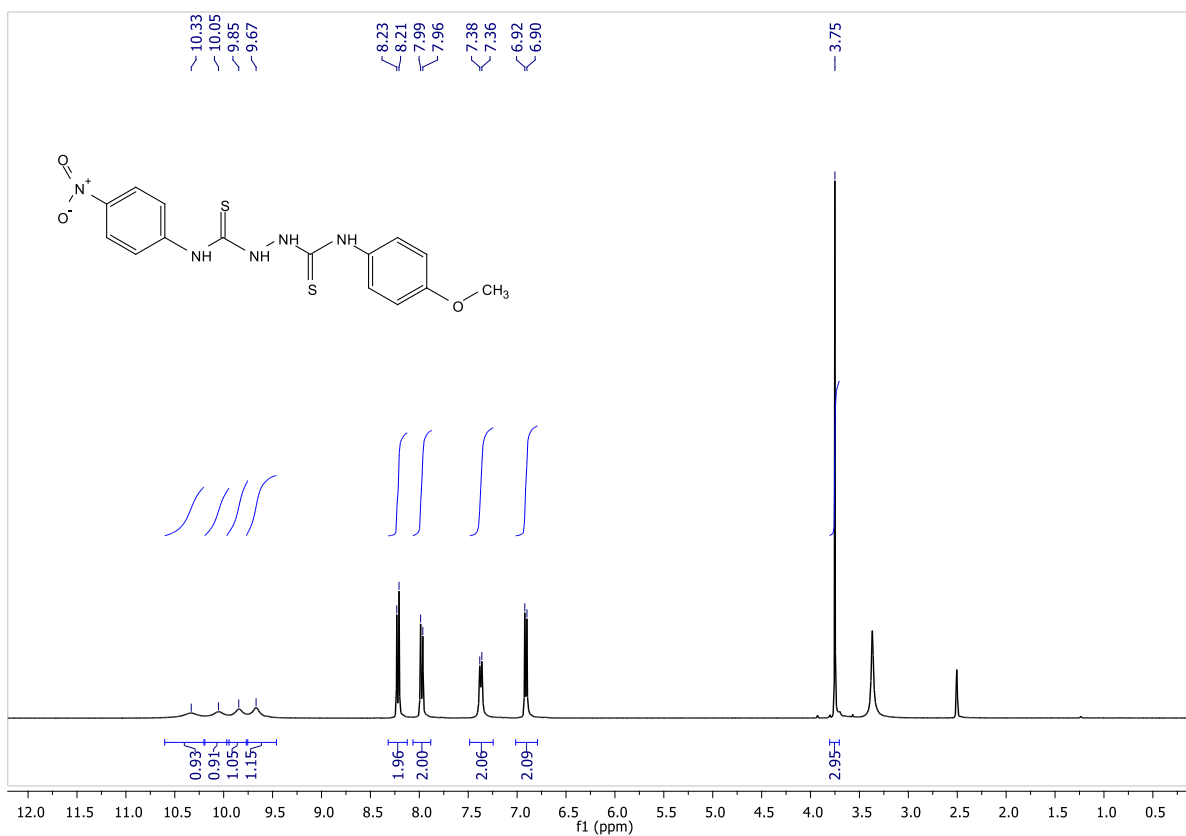

**Fig. S34.**  $^1\text{H-NMR}$  (400 MHz,  $\text{DMSO-d}_6$ ) spectra of compound **3i** ( $N^1$ -(4-methoxyphenyl)- $N^2$ -(4-nitrophenyl)hydrazine-1,2-bis(carbothioamide)).

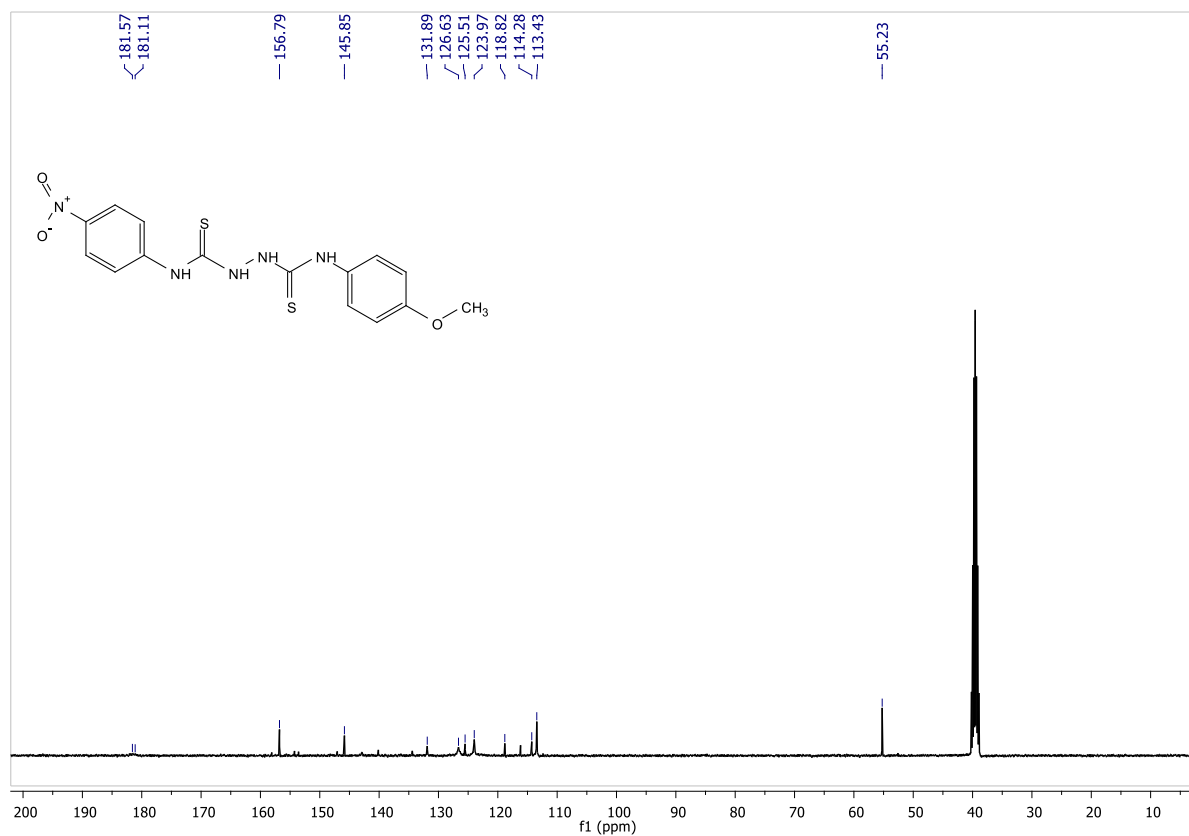

**Fig. S35.**  $^{13}\text{C}$ -NMR (100 MHz,  $\text{DMSO-}d_6$ ) spectra of compound **3i** ( $N^1$ -(4-methoxyphenyl)- $N^2$ -(4-nitrophenyl)hydrazine-1,2-bis(carbothioamide)).

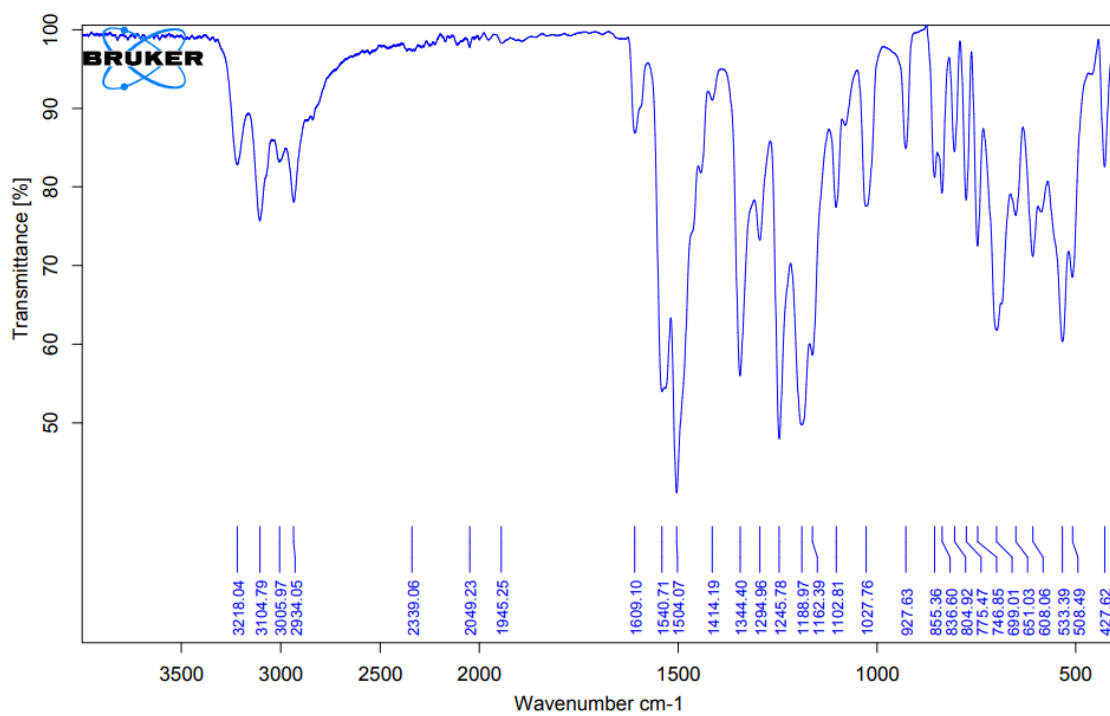

**Fig. S36.** FT-IR spectra of compound **3i** (*N*<sup>1</sup>-(4-methoxyphenyl)-*N*<sup>2</sup>-(4-nitrophenyl)hydrazine-1,2-bis(carbothioamide)).

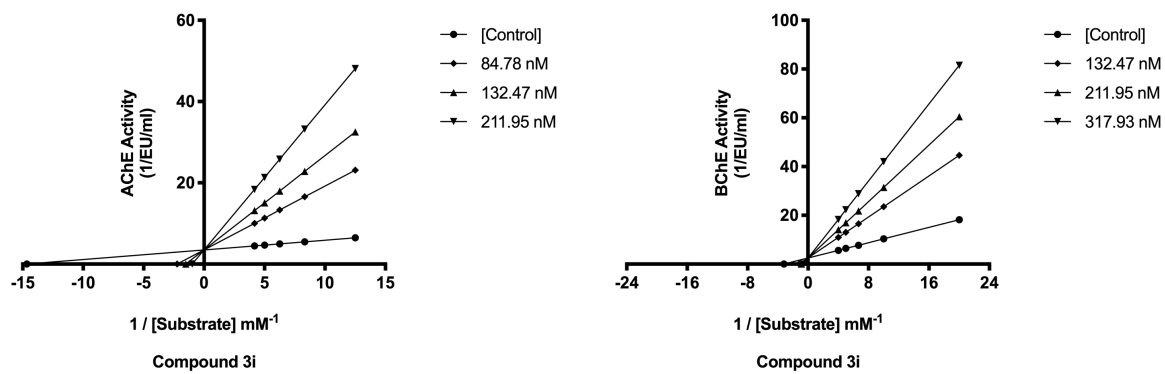

**Fig. S37.** Lineweaver-Burk plots of compound **3i** (*N*<sup>1</sup>-(4-methoxyphenyl)-*N*<sup>2</sup>-(4-nitrophenyl)hydrazine-1,2-bis(carbothioamide)).

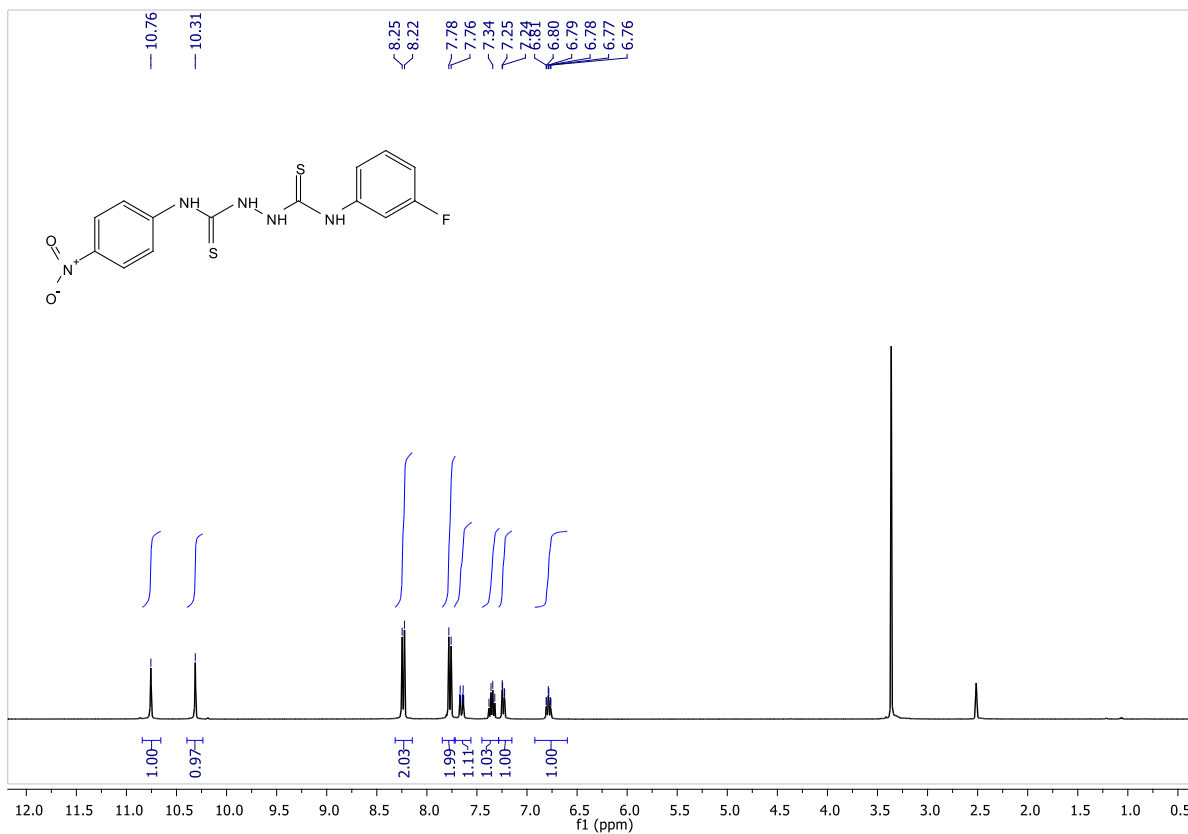

**Fig. S38.**  $^1\text{H-NMR}$  (400 MHz,  $\text{DMSO-}d_6$ ) spectra of compound **3j** ( $N^1$ -(3-fluorophenyl)- $N^2$ -(4-nitrophenyl)hydrazine-1,2-bis(carbothioamide)).

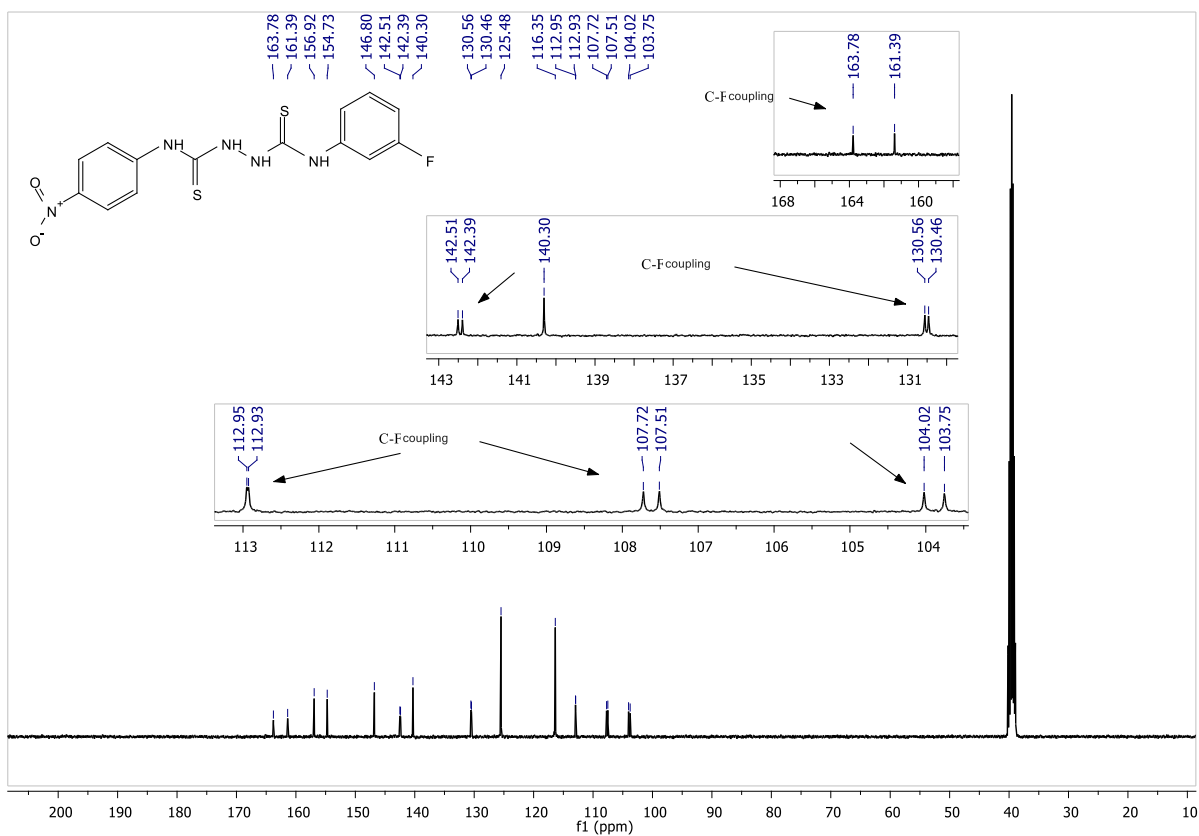

**Fig. S39.**  $^{13}\text{C}$ -NMR (100 MHz,  $\text{DMSO-}d_6$ ) spectra of compound **3j** ( $N^1$ -(3-fluorophenyl)- $N^2$ -(4-nitrophenyl)hydrazine-1,2-bis(carbothioamide)).



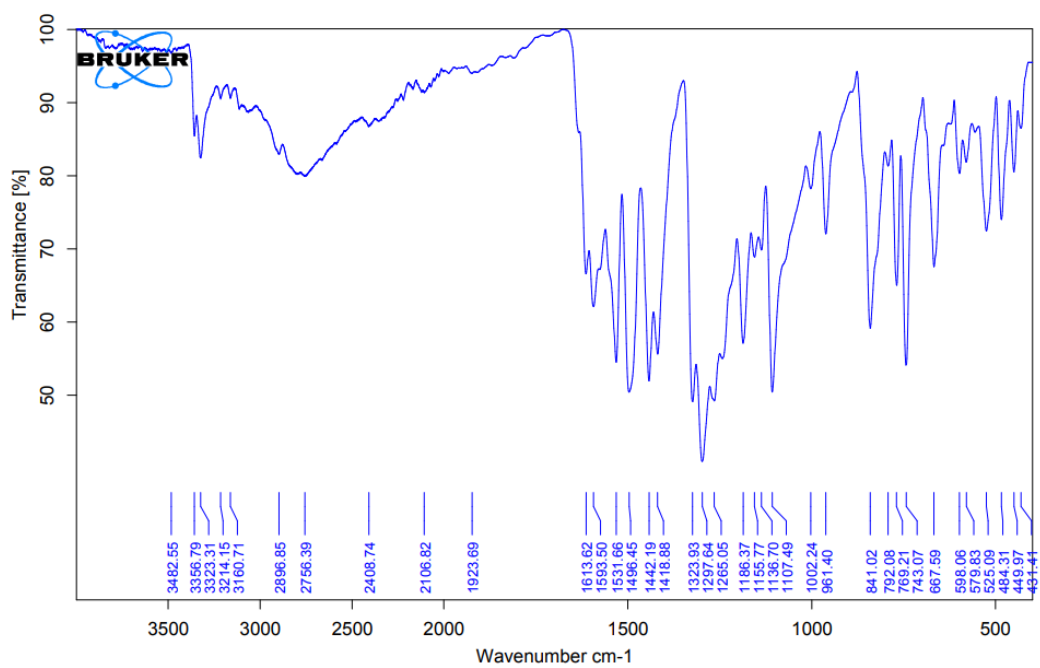

**Fig. S40.** FT-IR spectra of compound **3j** (*N*<sup>1</sup>-(3-fluorophenyl)-*N*<sup>2</sup>-(4-nitrophenyl)hydrazine-1,2-bis(carbothioamide)).

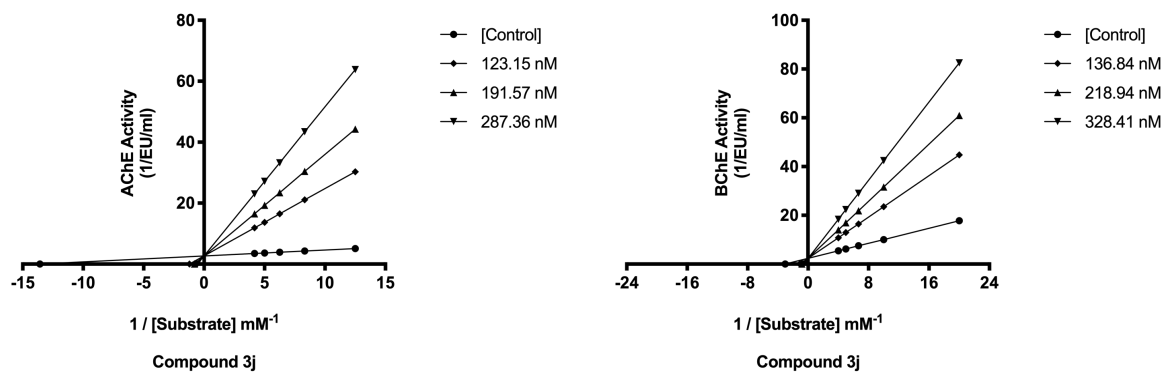

**Fig. S41.** Lineweaver-Burk plots of compound **3j** (*N*<sup>1</sup>-(3-fluorophenyl)-*N*<sup>2</sup>-(4-nitrophenyl)hydrazine-1,2-bis(carbothioamide)).

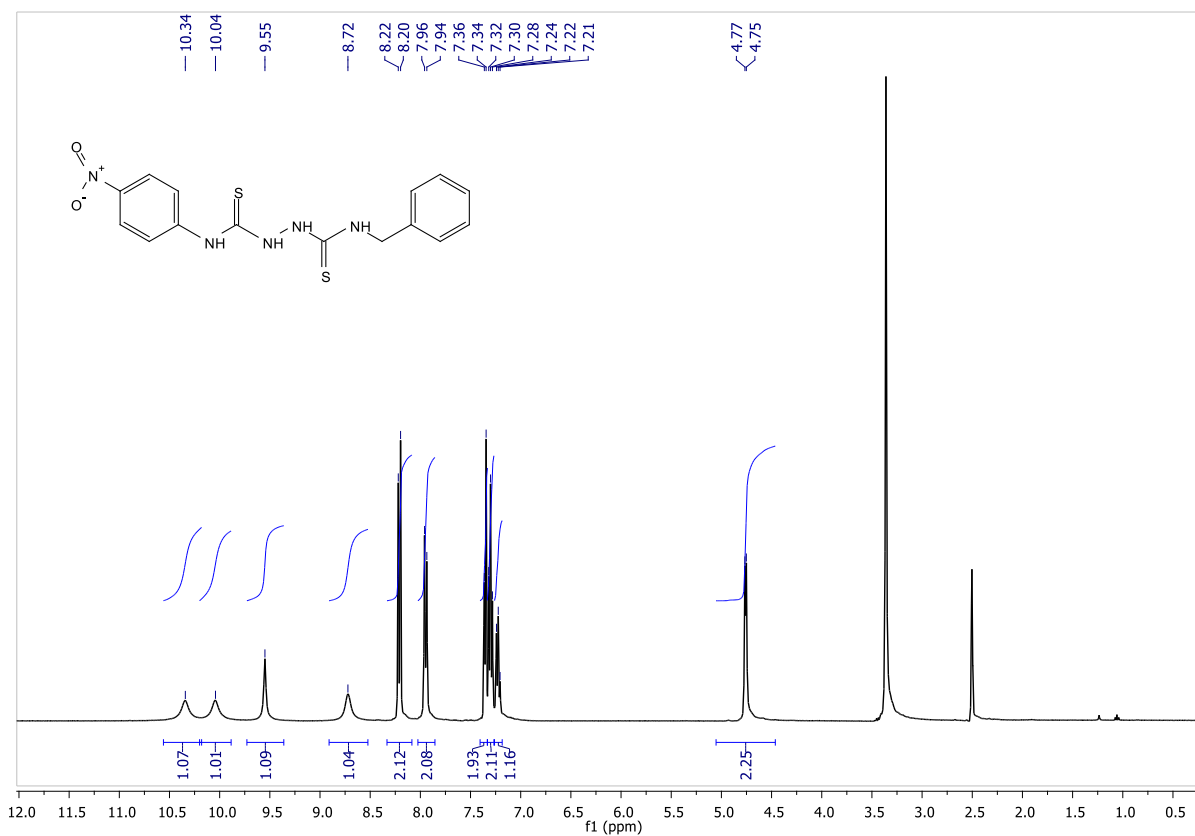

**Fig. S42.**  $^1\text{H-NMR}$  (400 MHz,  $\text{DMSO-}d_6$ ) spectra of compound **3k** ( $N^1$ -benzyl- $N^2$ -(4-nitrophenyl)hydrazine-1,2-bis(carbothioamide)).

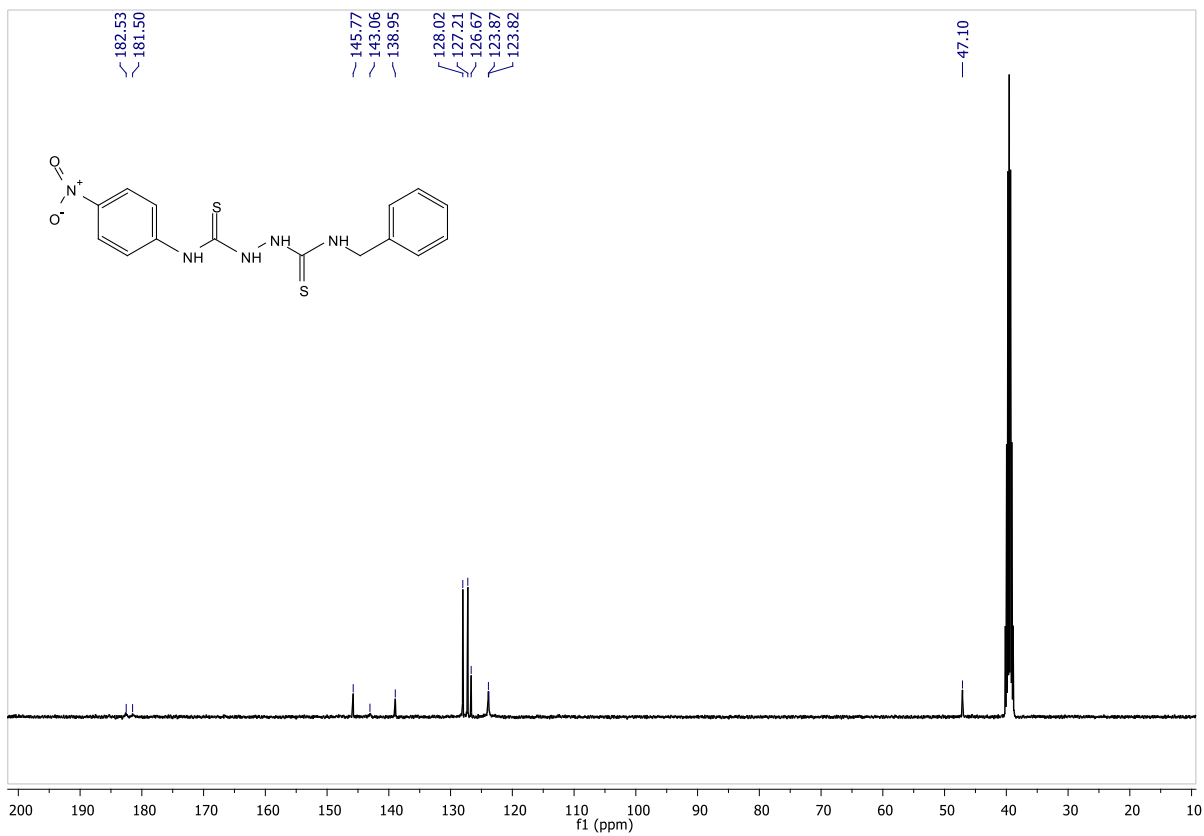

**Fig. S43.**  $^{13}\text{C}$ -NMR (100 MHz,  $\text{DMSO-}d_6$ ) spectra of compound **3k** ( $N^1$ -benzyl- $N^2$ -(4-nitrophenyl)hydrazine-1,2-bis(carbothioamide)).

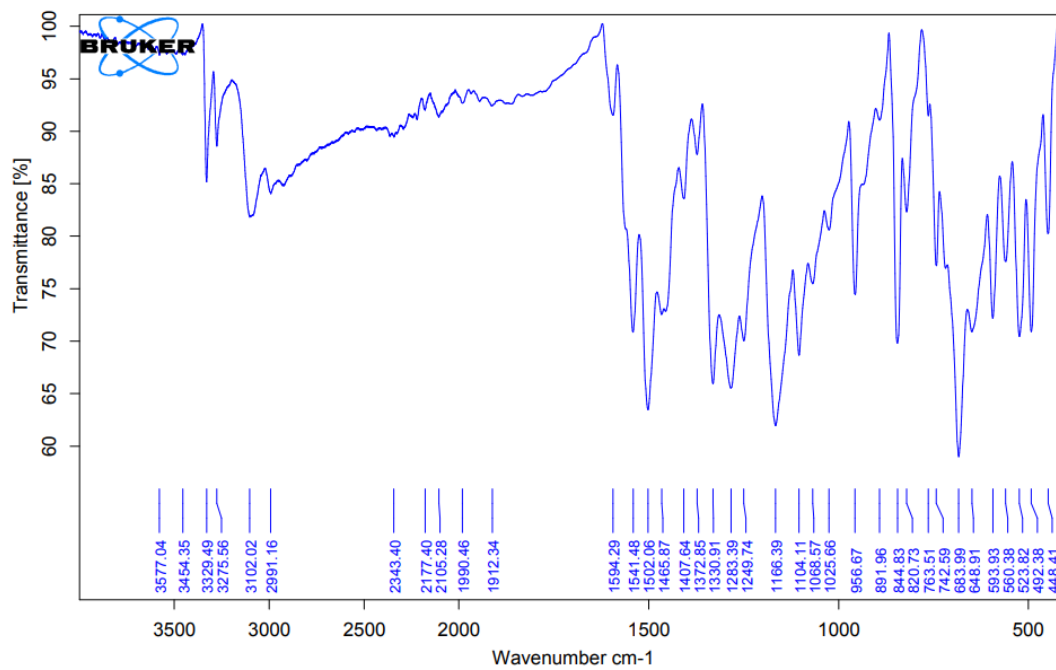

Fig. S44. FT-IR spectra of compound **3k** (*N*<sup>1</sup>-benzyl-*N*<sup>2</sup>-(4-nitrophenyl)hydrazine-1,2-bis(carbothioamide)).

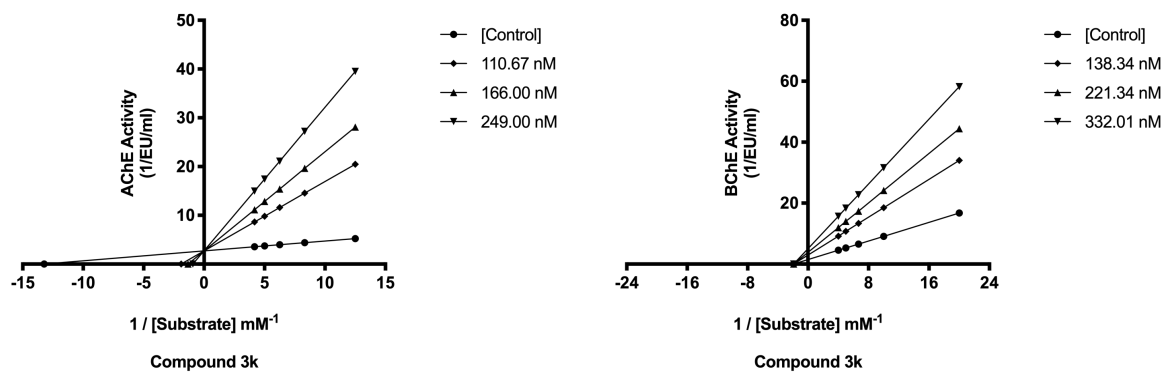

**Fig. S45.** Lineweaver-Burk plots of compound **3k** (*N*<sup>1</sup>-benzyl-*N*<sup>2</sup>-(4-nitrophenyl)hydrazine-1,2-bis(carbothioamide)).

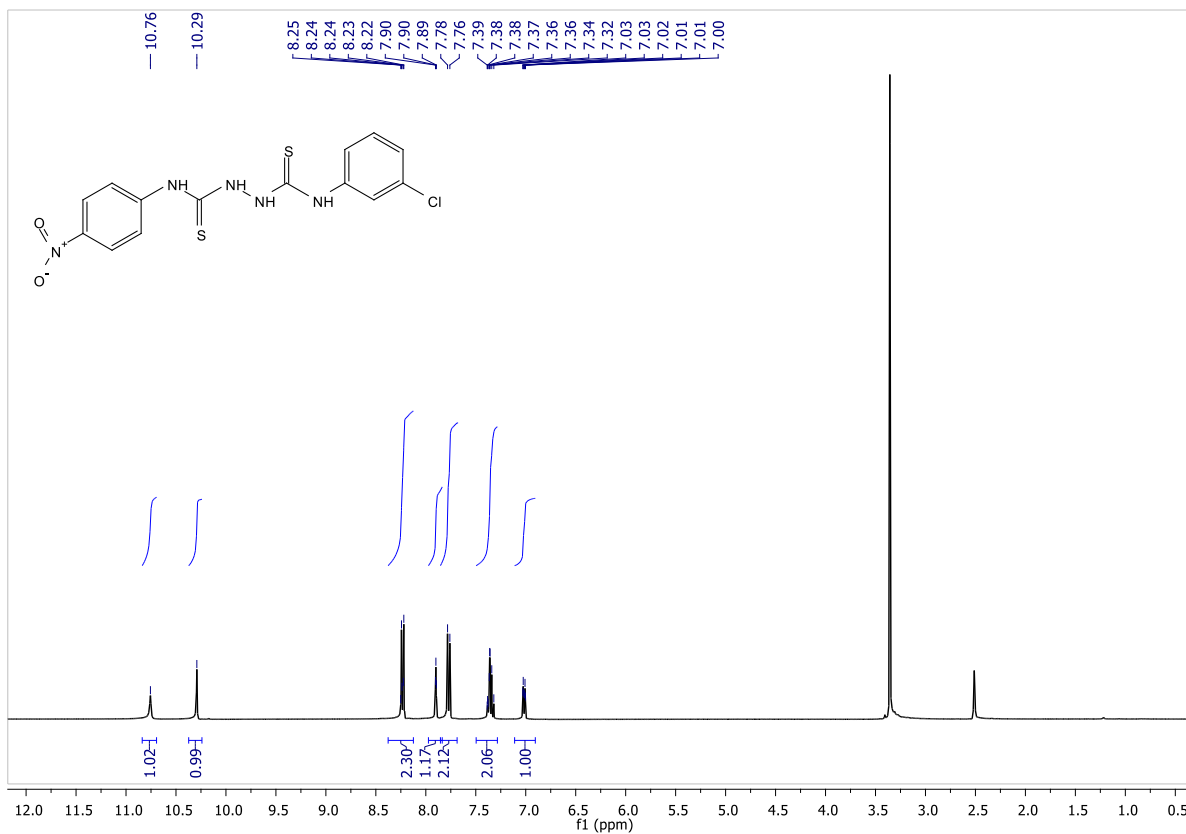

**Fig. S46.**  $^1\text{H-NMR}$  (400 MHz,  $\text{DMSO-}d_6$ ) spectra of compound **3I** ( $N^1$ -(3-chlorophenyl)- $N^2$ -(4-nitrophenyl)hydrazine-1,2-bis(carbothioamide)).

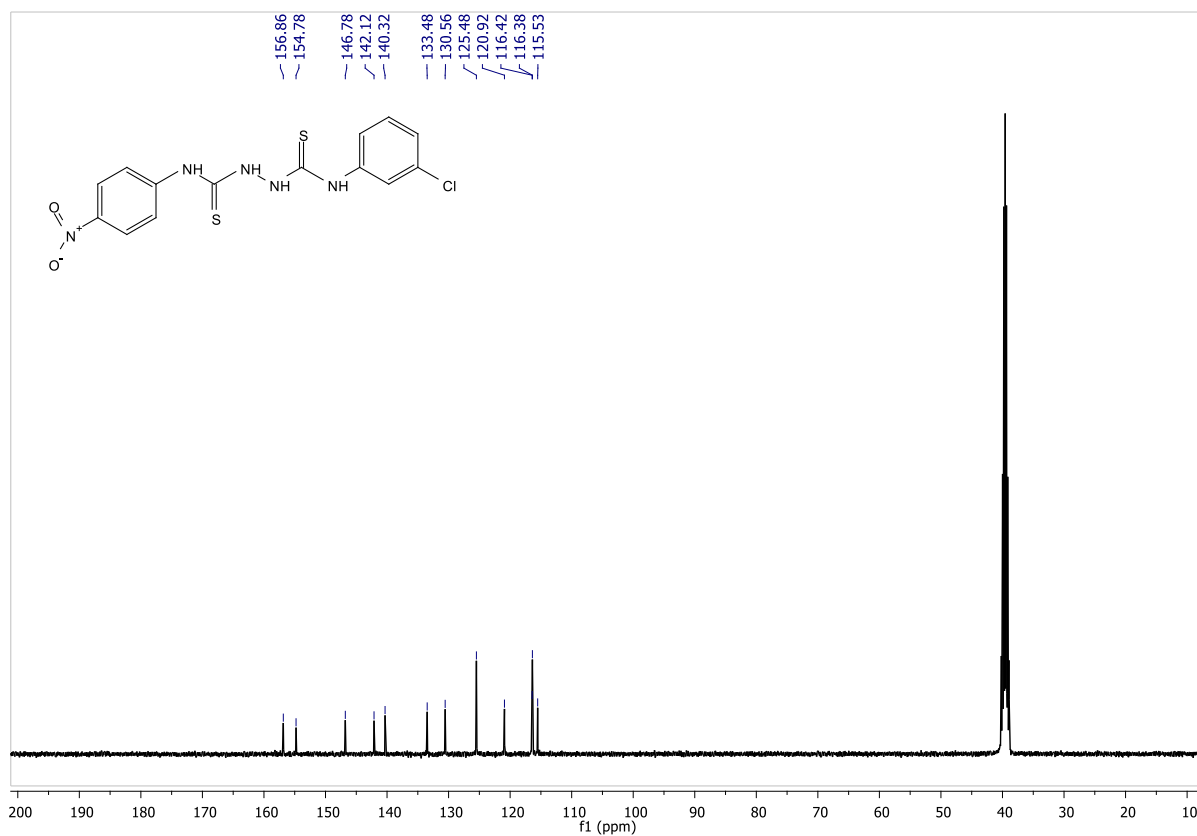

**Fig. S47.** <sup>13</sup>C-NMR (100 MHz, DMSO-*d*<sub>6</sub>) spectra of compound **3I** ( $N^1$ -(3-chlorophenyl)- $N^2$ -(4-nitrophenyl)hydrazine-1,2-bis(carbothioamide)).



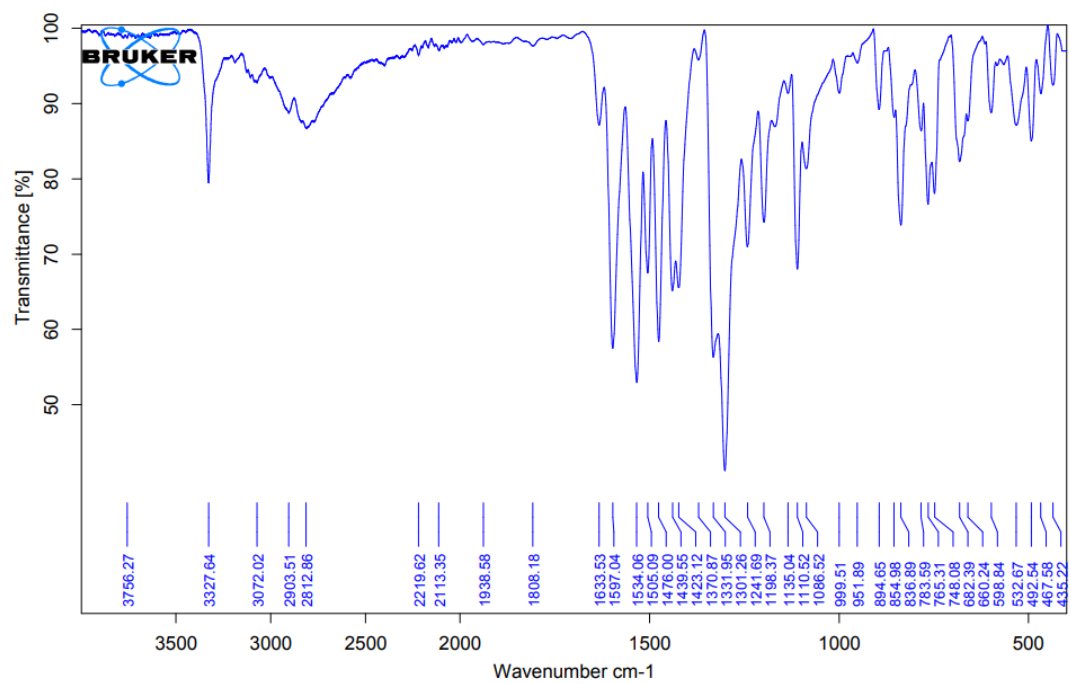

**Fig. S48.** FT-IR spectra of compound **3I** (*N*<sup>1</sup>-(3-chlorophenyl)-*N*<sup>2</sup>-(4-nitrophenyl)hydrazine-1,2-bis(carbothioamide)).

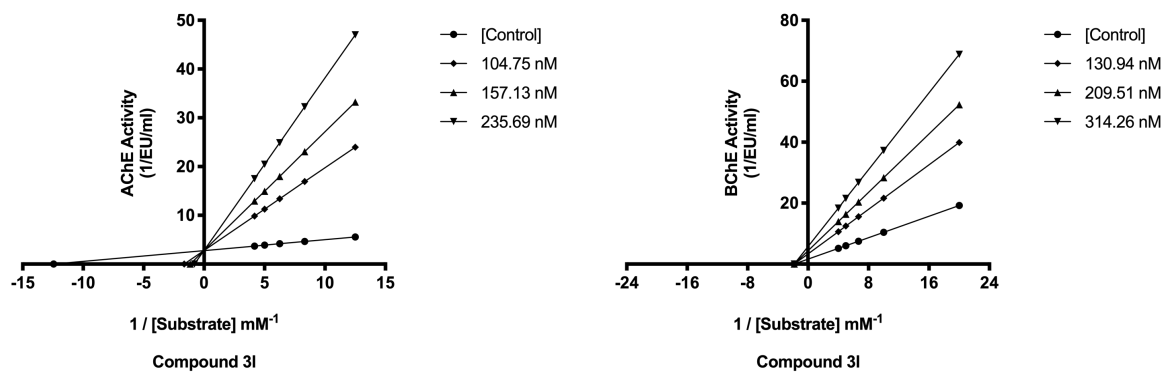

**Fig. S49.** Lineweaver-Burk plots of compound **31** (*N*<sup>1</sup>-(3-chlorophenyl)-*N*<sup>2</sup>-(4-nitrophenyl)hydrazine-1,2-bis(carbothioamide)).
